# Supplementary material for: Synthesis and characterisation of κ2-N,O-oxazoline-enolate complexes of nickel(ii): explorations in coordination chemistry and metal-mediated polymerisation
Source: Royal Society of Chemistry journal article supplement (doi:10.1039/c8ra10304f), 2019-01-01
Supplement: c8ra10304f1.pdf [file c8ra10304f1.pdf]

**Electronic Supplementary Information: Adjei, Lough & Gossage**

|                                                                                                                | Page |
|----------------------------------------------------------------------------------------------------------------|------|
| Calculation of $\mu_{\text{eff}}$ for Complex <b>3a</b> .                                                      | 2    |
| DFT Treatment of <b>3a</b> : HOMO- <i>a</i> , and HOMO- <i>b</i><br>and Spin Density Schematically Represented | 3    |
| Typical UV-Vis spectrum ( <b>3a</b> )                                                                          | 4    |
| Crystal data and Refinement of Complexes <b>3a-c</b> and <b>3e-g</b> .                                         | 5    |
| Complex <b>3a</b> .                                                                                            | 5    |
| Complex <b>3b</b> .                                                                                            | 19   |
| Complex <b>3c</b> .                                                                                            | 32   |
| Complex <b>3e</b> .                                                                                            | 47   |
| Complex <b>3f</b> .                                                                                            | 62   |
| Complex <b>3g</b> .                                                                                            | 77   |
| Polystyrene Characterisation                                                                                   | 90   |
| References                                                                                                     | 93   |

### Calculated Diamagnetic Corrections<sup>1</sup>

$$\begin{aligned} X_D(\text{ligand}) &= 9X_D(\text{C}_{\text{ring}}) + X_D(\text{N}_{\text{ring}}) + 2X_D(\text{O}) + 14X_D(\text{H}) + 4X_D(\text{C}) + \lambda_i(\text{C}=\text{C}) + \lambda_i(\text{benzene}) + \lambda_i(\text{C}=\text{N}) \\ &= [9(-6.24) + (-4.61) + 2(-4.6) + 14(-2.93) + 4(-6.0) + (+5.5) + (-1.4) + (+8.15)] \times 10^{-6} \text{ emu}\cdot\text{mol}^{-1} \\ &= -122.73 \times 10^{-6} \text{ emu}\cdot\text{mol}^{-1} \end{aligned}$$

$$2 \text{ ligands} = -257.46 \times 10^{-6} \text{ emu}\cdot\text{mol}^{-1}$$

$$+ \lambda_i(\text{Ni}^{2+})$$

$$= [-257.46 + (-12)] \times 10^{-6} \text{ emu}\cdot\text{mol}^{-1}$$

$$= -2.6946 \times 10^{-4} \text{ emu}\cdot\text{mol}^{-1}$$

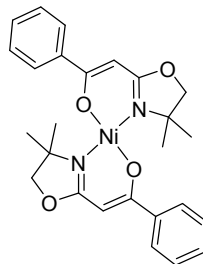

### Calculated molar susceptibility (measured)

$$X_M = X_g(\text{MW})$$

$$X_M = 0.000010 \text{ emu}\cdot\text{g} \text{ (491.213 g/mol)}$$

$$X_M = +4.9 \times 10^{-3} \text{ emu}\cdot\text{mol}^{-1}$$

### Overall

$$X_p = X_M + X_D = -2.6946 \times 10^{-4} + 4.9 \times 10^{-3} \text{ emu}\cdot\text{mol}^{-1} = +4.6 \times 10^{-3} \text{ emu}\cdot\text{mol}^{-1}$$

### Unpaired Electrons:

$$\mu_{\text{eff}} = 2.828\sqrt{298.15 \cdot X_p} = \mu_{\text{eff}} = 2.828\sqrt{1.37} = \mu_{\text{eff}} = 3.31 \text{ B. M.}$$

**DFT Treatment Calculations (B3LYP 6-311+G\*\*/LANL2DZ) of Complex 3a.<sup>2</sup>**

HOMO-*a*, and HOMO-*b* and Spin Density: Schematically Representated

HOMO-*a*

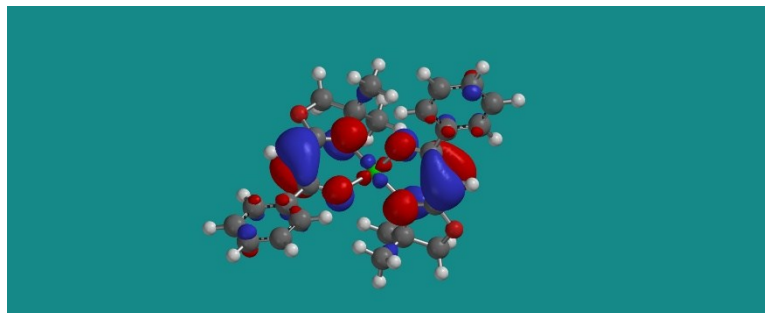

HOMO-*b*

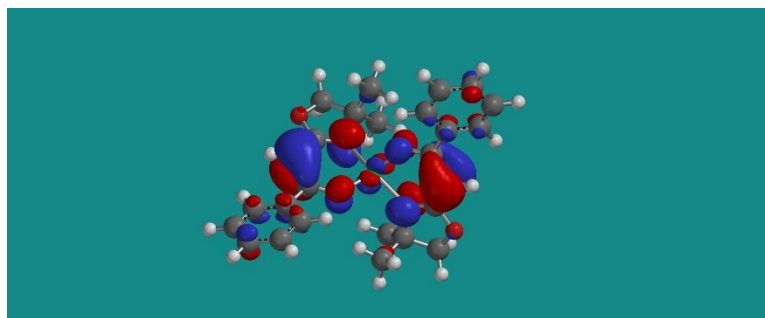

Spin Density

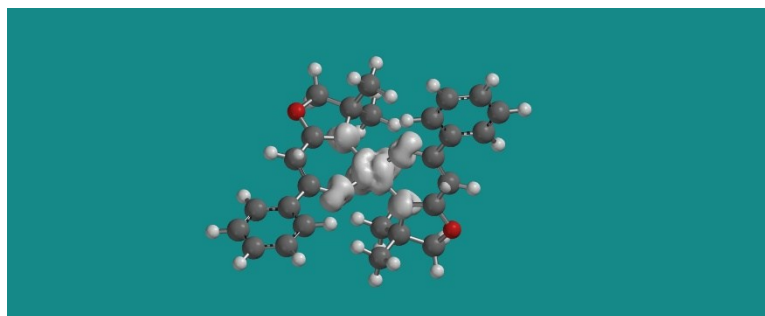

Typical UV-Vis. Spectrum (Complex 3a).<sup>3</sup>

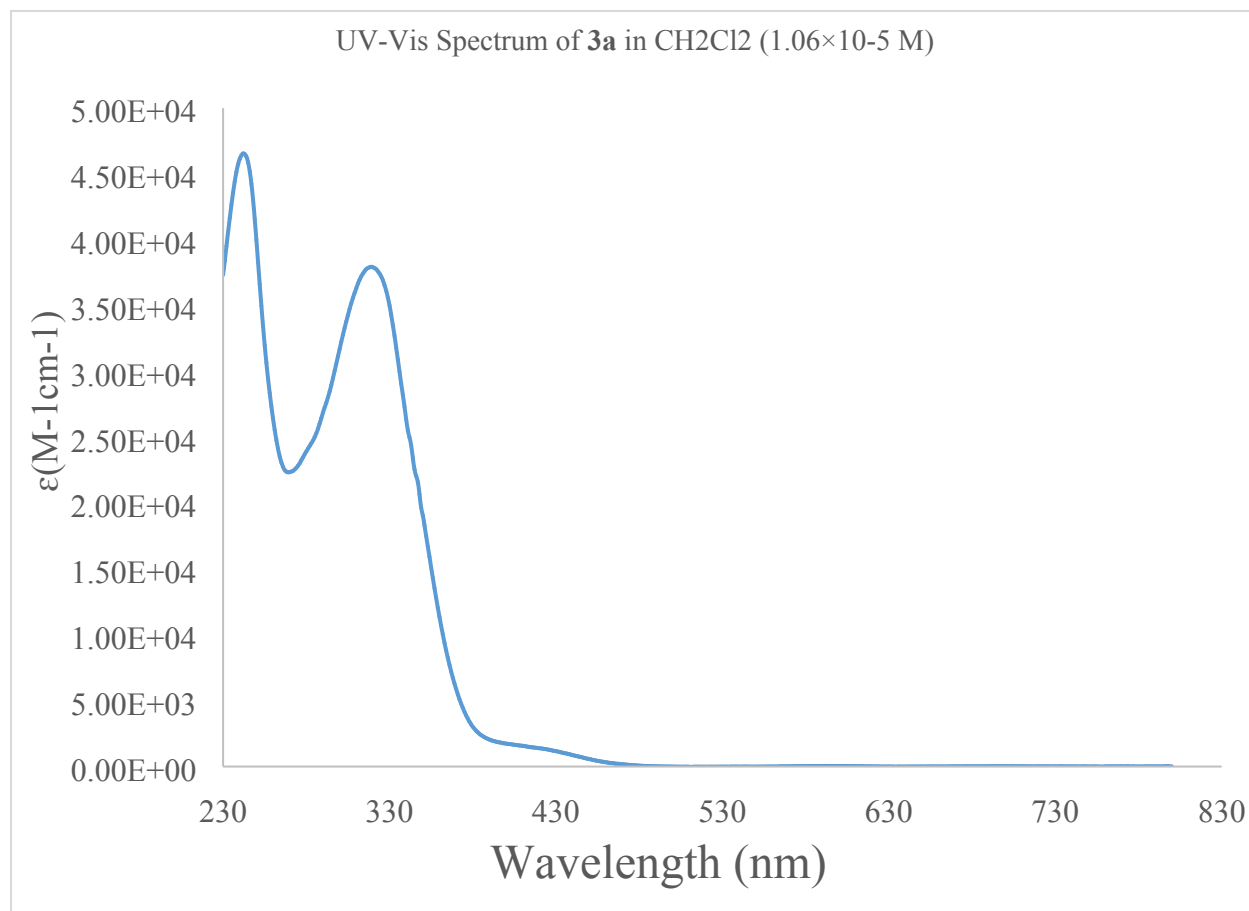

## X-ray data: complexes **3a-c** and **3e-g**.<sup>4-13</sup>

*n.b.*, CCDC numbers 1884791-1884796 have been assigned to the crystallographic data files for complexes **3a-c** and **3e-g**, respectively.

### Complex **3a**

Table 1. Crystal data and structure refinement for d1837\_a.

|                                   |                                                                  |                 |
|-----------------------------------|------------------------------------------------------------------|-----------------|
| Identification code               | d1837_a                                                          |                 |
| Empirical formula                 | C <sub>26</sub> H <sub>28</sub> N <sub>2</sub> Ni O <sub>4</sub> |                 |
| Formula weight                    | 491.21                                                           |                 |
| Temperature                       | 150(2) K                                                         |                 |
| Wavelength                        | 0.71073 Å                                                        |                 |
| Crystal system                    | Monoclinic                                                       |                 |
| Space group                       | P2 <sub>1</sub> /c                                               |                 |
| Unit cell dimensions              | a = 12.0764(17) Å                                                | α = 90°.        |
|                                   | b = 9.6715(15) Å                                                 | β = 92.155(5)°. |
|                                   | c = 20.657(4) Å                                                  | γ = 90°.        |
| Volume                            | 2411.0(7) Å <sup>3</sup>                                         |                 |
| Z                                 | 4                                                                |                 |
| Density (calculated)              | 1.353 Mg/m <sup>3</sup>                                          |                 |
| Absorption coefficient            | 0.839 mm <sup>-1</sup>                                           |                 |
| F(000)                            | 1032                                                             |                 |
| Crystal size                      | 0.150 x 0.150 x 0.040 mm <sup>3</sup>                            |                 |
| Theta range for data collection   | 1.687 to 24.999°.                                                |                 |
| Index ranges                      | -14 ≤ h ≤ 13, -11 ≤ k ≤ 11, -24 ≤ l ≤ 24                         |                 |
| Reflections collected             | 35050                                                            |                 |
| Independent reflections           | 4251 [R(int) = 0.1140]                                           |                 |
| Completeness to theta = 24.999°   | 100.0 %                                                          |                 |
| Absorption correction             | Semi-empirical from equivalents                                  |                 |
| Max. and min. transmission        | 0.7456 and 0.6875                                                |                 |
| Refinement method                 | Full-matrix least-squares on F <sup>2</sup>                      |                 |
| Data / restraints / parameters    | 4251 / 0 / 302                                                   |                 |
| Goodness-of-fit on F <sup>2</sup> | 1.001                                                            |                 |
| Final R indices [I > 2σ(I)]       | R1 = 0.0438, wR2 = 0.0720                                        |                 |
| R indices (all data)              | R1 = 0.0928, wR2 = 0.0868                                        |                 |
| Extinction coefficient            | n/a                                                              |                 |
| Largest diff. peak and hole       | 0.392 and -0.419 e.Å <sup>-3</sup>                               |                 |

Table 2. Atomic coordinates ( $\times 10^4$ ) and equivalent isotropic displacement parameters ( $\text{\AA}^2 \times 10^3$ ) for d1837\_a.  $U(\text{eq})$  is defined as one third of the trace of the orthogonalized  $U^{ij}$  tensor.

|       | x        | y        | z       | $U(\text{eq})$ |
|-------|----------|----------|---------|----------------|
| Ni(1) | 2636(1)  | 7737(1)  | 6155(1) | 22(1)          |
| O(1)  | 3870(2)  | 6590(2)  | 6414(1) | 23(1)          |
| O(2)  | 5178(2)  | 10462(2) | 5906(1) | 36(1)          |
| O(3)  | 1323(2)  | 8216(2)  | 6592(1) | 24(1)          |
| O(4)  | 297(2)   | 6584(2)  | 4775(1) | 33(1)          |
| N(1)  | 3580(2)  | 9312(3)  | 5998(1) | 21(1)          |
| N(2)  | 1796(2)  | 6970(3)  | 5422(1) | 21(1)          |
| C(1)  | 4655(3)  | 9268(3)  | 6054(2) | 24(1)          |
| C(2)  | 5327(3)  | 8145(3)  | 6250(2) | 26(1)          |
| C(3)  | 4918(2)  | 6897(3)  | 6439(2) | 21(1)          |
| C(4)  | 4336(3)  | 11408(4) | 5659(2) | 35(1)          |
| C(5)  | 3227(3)  | 10733(3) | 5821(2) | 26(1)          |
| C(6)  | 5662(2)  | 5782(3)  | 6696(2) | 22(1)          |
| C(7)  | 5221(3)  | 4517(3)  | 6865(2) | 26(1)          |
| C(8)  | 5885(3)  | 3467(4)  | 7115(2) | 33(1)          |
| C(9)  | 7006(3)  | 3671(4)  | 7200(2) | 34(1)          |
| C(10) | 7464(3)  | 4916(4)  | 7040(2) | 36(1)          |
| C(11) | 6807(3)  | 5974(4)  | 6791(2) | 30(1)          |
| C(12) | 2436(3)  | 10696(4) | 5238(2) | 49(1)          |
| C(13) | 2736(3)  | 11420(4) | 6401(2) | 50(1)          |
| C(14) | 307(2)   | 8194(3)  | 6365(2) | 24(1)          |
| C(15) | -20(3)   | 7687(4)  | 5768(2) | 29(1)          |
| C(16) | 726(3)   | 7097(3)  | 5340(2) | 24(1)          |
| C(17) | 1224(3)  | 6180(4)  | 4395(2) | 33(1)          |
| C(18) | 2226(3)  | 6160(3)  | 4878(2) | 26(1)          |
| C(19) | -518(2)  | 8771(3)  | 6811(2) | 28(1)          |
| C(20) | -335(3)  | 8631(4)  | 7473(2) | 37(1)          |
| C(21) | -1073(3) | 9174(4)  | 7906(2) | 49(1)          |
| C(22) | -2007(3) | 9858(4)  | 7671(3) | 52(1)          |
| C(23) | -2201(3) | 10006(4) | 7018(3) | 51(1)          |
| C(24) | -1457(3) | 9469(4)  | 6587(2) | 38(1)          |

|       |         |         |         |       |
|-------|---------|---------|---------|-------|
| C(25) | 3243(3) | 6848(4) | 4611(2) | 38(1) |
| C(26) | 2494(3) | 4707(3) | 5111(2) | 36(1) |

---

Table 3. Bond lengths [Å] and angles [°] for d1837\_a.

---

|              |          |
|--------------|----------|
| Ni(1)-O(3)   | 1.912(2) |
| Ni(1)-O(1)   | 1.917(2) |
| Ni(1)-N(2)   | 1.937(3) |
| Ni(1)-N(1)   | 1.937(3) |
| O(1)-C(3)    | 1.299(3) |
| O(2)-C(1)    | 1.356(4) |
| O(2)-C(4)    | 1.447(4) |
| O(3)-C(14)   | 1.297(4) |
| O(4)-C(16)   | 1.353(4) |
| O(4)-C(17)   | 1.444(4) |
| N(1)-C(1)    | 1.300(4) |
| N(1)-C(5)    | 1.481(4) |
| N(2)-C(16)   | 1.302(4) |
| N(2)-C(18)   | 1.481(4) |
| C(1)-C(2)    | 1.406(4) |
| C(2)-C(3)    | 1.367(4) |
| C(2)-H(2A)   | 0.9500   |
| C(3)-C(6)    | 1.489(4) |
| C(4)-C(5)    | 1.538(4) |
| C(4)-H(4A)   | 0.9900   |
| C(4)-H(4B)   | 0.9900   |
| C(5)-C(12)   | 1.508(5) |
| C(5)-C(13)   | 1.510(5) |
| C(6)-C(7)    | 1.384(4) |
| C(6)-C(11)   | 1.401(4) |
| C(7)-C(8)    | 1.382(4) |
| C(7)-H(7A)   | 0.9500   |
| C(8)-C(9)    | 1.373(5) |
| C(8)-H(8A)   | 0.9500   |
| C(9)-C(10)   | 1.371(5) |
| C(9)-H(9A)   | 0.9500   |
| C(10)-C(11)  | 1.383(5) |
| C(10)-H(10A) | 0.9500   |
| C(11)-H(11A) | 0.9500   |



|                 |            |
|-----------------|------------|
| C(12)-H(12A)    | 0.9800     |
| C(12)-H(12B)    | 0.9800     |
| C(12)-H(12C)    | 0.9800     |
| C(13)-H(13A)    | 0.9800     |
| C(13)-H(13B)    | 0.9800     |
| C(13)-H(13C)    | 0.9800     |
| C(14)-C(15)     | 1.371(5)   |
| C(14)-C(19)     | 1.491(5)   |
| C(15)-C(16)     | 1.407(4)   |
| C(15)-H(15A)    | 0.9500     |
| C(17)-C(18)     | 1.539(5)   |
| C(17)-H(17A)    | 0.9900     |
| C(17)-H(17B)    | 0.9900     |
| C(18)-C(26)     | 1.517(5)   |
| C(18)-C(25)     | 1.518(4)   |
| C(19)-C(20)     | 1.384(5)   |
| C(19)-C(24)     | 1.384(5)   |
| C(20)-C(21)     | 1.389(5)   |
| C(20)-H(20A)    | 0.9500     |
| C(21)-C(22)     | 1.379(6)   |
| C(21)-H(21A)    | 0.9500     |
| C(22)-C(23)     | 1.368(6)   |
| C(22)-H(22A)    | 0.9500     |
| C(23)-C(24)     | 1.389(5)   |
| C(23)-H(23A)    | 0.9500     |
| C(24)-H(24A)    | 0.9500     |
| C(25)-H(25A)    | 0.9800     |
| C(25)-H(25B)    | 0.9800     |
| C(25)-H(25C)    | 0.9800     |
| C(26)-H(26A)    | 0.9800     |
| C(26)-H(26B)    | 0.9800     |
| C(26)-H(26C)    | 0.9800     |
| O(3)-Ni(1)-O(1) | 131.15(9)  |
| O(3)-Ni(1)-N(2) | 92.44(10)  |
| O(1)-Ni(1)-N(2) | 112.04(10) |

|                  |            |
|------------------|------------|
| O(3)-Ni(1)-N(1)  | 113.07(10) |
| O(1)-Ni(1)-N(1)  | 92.62(10)  |
| N(2)-Ni(1)-N(1)  | 117.71(11) |
| C(3)-O(1)-Ni(1)  | 128.7(2)   |
| C(1)-O(2)-C(4)   | 106.9(2)   |
| C(14)-O(3)-Ni(1) | 127.9(2)   |
| C(16)-O(4)-C(17) | 106.8(2)   |
| C(1)-N(1)-C(5)   | 109.3(3)   |
| C(1)-N(1)-Ni(1)  | 123.5(2)   |
| C(5)-N(1)-Ni(1)  | 127.2(2)   |
| C(16)-N(2)-C(18) | 109.0(3)   |
| C(16)-N(2)-Ni(1) | 123.6(2)   |
| C(18)-N(2)-Ni(1) | 127.37(19) |
| N(1)-C(1)-O(2)   | 115.1(3)   |
| N(1)-C(1)-C(2)   | 127.9(3)   |
| O(2)-C(1)-C(2)   | 117.0(3)   |
| C(3)-C(2)-C(1)   | 123.6(3)   |
| C(3)-C(2)-H(2A)  | 118.2      |
| C(1)-C(2)-H(2A)  | 118.2      |
| O(1)-C(3)-C(2)   | 123.5(3)   |
| O(1)-C(3)-C(6)   | 115.0(3)   |
| C(2)-C(3)-C(6)   | 121.4(3)   |
| O(2)-C(4)-C(5)   | 105.1(3)   |
| O(2)-C(4)-H(4A)  | 110.7      |
| C(5)-C(4)-H(4A)  | 110.7      |
| O(2)-C(4)-H(4B)  | 110.7      |
| C(5)-C(4)-H(4B)  | 110.7      |
| H(4A)-C(4)-H(4B) | 108.8      |
| N(1)-C(5)-C(12)  | 110.1(3)   |
| N(1)-C(5)-C(13)  | 109.3(3)   |
| C(12)-C(5)-C(13) | 112.8(3)   |
| N(1)-C(5)-C(4)   | 101.7(2)   |
| C(12)-C(5)-C(4)  | 111.5(3)   |
| C(13)-C(5)-C(4)  | 110.9(3)   |
| C(7)-C(6)-C(11)  | 118.0(3)   |
| C(7)-C(6)-C(3)   | 119.8(3)   |

|                     |          |
|---------------------|----------|
| C(11)-C(6)-C(3)     | 122.2(3) |
| C(8)-C(7)-C(6)      | 121.3(3) |
| C(8)-C(7)-H(7A)     | 119.3    |
| C(6)-C(7)-H(7A)     | 119.3    |
| C(9)-C(8)-C(7)      | 119.9(3) |
| C(9)-C(8)-H(8A)     | 120.1    |
| C(7)-C(8)-H(8A)     | 120.1    |
| C(10)-C(9)-C(8)     | 120.0(3) |
| C(10)-C(9)-H(9A)    | 120.0    |
| C(8)-C(9)-H(9A)     | 120.0    |
| C(9)-C(10)-C(11)    | 120.6(3) |
| C(9)-C(10)-H(10A)   | 119.7    |
| C(11)-C(10)-H(10A)  | 119.7    |
| C(10)-C(11)-C(6)    | 120.2(3) |
| C(10)-C(11)-H(11A)  | 119.9    |
| C(6)-C(11)-H(11A)   | 119.9    |
| C(5)-C(12)-H(12A)   | 109.5    |
| C(5)-C(12)-H(12B)   | 109.5    |
| H(12A)-C(12)-H(12B) | 109.5    |
| C(5)-C(12)-H(12C)   | 109.5    |
| H(12A)-C(12)-H(12C) | 109.5    |
| H(12B)-C(12)-H(12C) | 109.5    |
| C(5)-C(13)-H(13A)   | 109.5    |
| C(5)-C(13)-H(13B)   | 109.5    |
| H(13A)-C(13)-H(13B) | 109.5    |
| C(5)-C(13)-H(13C)   | 109.5    |
| H(13A)-C(13)-H(13C) | 109.5    |
| H(13B)-C(13)-H(13C) | 109.5    |
| O(3)-C(14)-C(15)    | 124.6(3) |
| O(3)-C(14)-C(19)    | 114.5(3) |
| C(15)-C(14)-C(19)   | 120.9(3) |
| C(14)-C(15)-C(16)   | 122.7(3) |
| C(14)-C(15)-H(15A)  | 118.6    |
| C(16)-C(15)-H(15A)  | 118.6    |
| N(2)-C(16)-O(4)     | 115.1(3) |
| N(2)-C(16)-C(15)    | 127.7(3) |

|                     |          |
|---------------------|----------|
| O(4)-C(16)-C(15)    | 117.2(3) |
| O(4)-C(17)-C(18)    | 105.0(3) |
| O(4)-C(17)-H(17A)   | 110.8    |
| C(18)-C(17)-H(17A)  | 110.8    |
| O(4)-C(17)-H(17B)   | 110.8    |
| C(18)-C(17)-H(17B)  | 110.8    |
| H(17A)-C(17)-H(17B) | 108.8    |
| N(2)-C(18)-C(26)    | 109.0(3) |
| N(2)-C(18)-C(25)    | 110.8(3) |
| C(26)-C(18)-C(25)   | 110.8(3) |
| N(2)-C(18)-C(17)    | 101.3(2) |
| C(26)-C(18)-C(17)   | 111.8(3) |
| C(25)-C(18)-C(17)   | 112.7(3) |
| C(20)-C(19)-C(24)   | 118.5(3) |
| C(20)-C(19)-C(14)   | 119.2(3) |
| C(24)-C(19)-C(14)   | 122.3(3) |
| C(19)-C(20)-C(21)   | 121.1(4) |
| C(19)-C(20)-H(20A)  | 119.5    |
| C(21)-C(20)-H(20A)  | 119.5    |
| C(22)-C(21)-C(20)   | 119.4(4) |
| C(22)-C(21)-H(21A)  | 120.3    |
| C(20)-C(21)-H(21A)  | 120.3    |
| C(23)-C(22)-C(21)   | 120.3(4) |
| C(23)-C(22)-H(22A)  | 119.8    |
| C(21)-C(22)-H(22A)  | 119.8    |
| C(22)-C(23)-C(24)   | 120.1(4) |
| C(22)-C(23)-H(23A)  | 119.9    |
| C(24)-C(23)-H(23A)  | 119.9    |
| C(19)-C(24)-C(23)   | 120.7(4) |
| C(19)-C(24)-H(24A)  | 119.7    |
| C(23)-C(24)-H(24A)  | 119.7    |
| C(18)-C(25)-H(25A)  | 109.5    |
| C(18)-C(25)-H(25B)  | 109.5    |
| H(25A)-C(25)-H(25B) | 109.5    |
| C(18)-C(25)-H(25C)  | 109.5    |
| H(25A)-C(25)-H(25C) | 109.5    |

|                     |       |
|---------------------|-------|
| H(25B)-C(25)-H(25C) | 109.5 |
| C(18)-C(26)-H(26A)  | 109.5 |
| C(18)-C(26)-H(26B)  | 109.5 |
| H(26A)-C(26)-H(26B) | 109.5 |
| C(18)-C(26)-H(26C)  | 109.5 |
| H(26A)-C(26)-H(26C) | 109.5 |
| H(26B)-C(26)-H(26C) | 109.5 |

---

Symmetry transformations used to generate equivalent atoms:

Table 4. Anisotropic displacement parameters ( $\text{\AA}^2 \times 10^3$ ) for d1837\_a. The anisotropic displacement factor exponent takes the form:  $-2\pi^2 [ h^2 a^{*2} U^{11} + \dots + 2 h k a^* b^* U^{12} ]$

|       | $U^{11}$ | $U^{22}$ | $U^{33}$ | $U^{23}$ | $U^{13}$ | $U^{12}$ |
|-------|----------|----------|----------|----------|----------|----------|
| Ni(1) | 14(1)    | 24(1)    | 28(1)    | 1(1)     | 0(1)     | -2(1)    |
| O(1)  | 16(1)    | 25(1)    | 28(2)    | 4(1)     | 0(1)     | 0(1)     |
| O(2)  | 27(1)    | 26(1)    | 54(2)    | 14(1)    | -3(1)    | -7(1)    |
| O(3)  | 14(1)    | 34(1)    | 24(2)    | 0(1)     | -2(1)    | 0(1)     |
| O(4)  | 25(1)    | 43(2)    | 32(2)    | -14(1)   | -5(1)    | -2(1)    |
| N(1)  | 24(2)    | 19(2)    | 20(2)    | 1(1)     | -2(1)    | -1(1)    |
| N(2)  | 18(1)    | 22(2)    | 25(2)    | -2(1)    | 2(1)     | -4(1)    |
| C(1)  | 23(2)    | 24(2)    | 26(2)    | 2(2)     | 0(2)     | -7(2)    |
| C(2)  | 14(2)    | 29(2)    | 36(2)    | 5(2)     | 0(2)     | -1(2)    |
| C(3)  | 18(2)    | 30(2)    | 15(2)    | -1(2)    | 2(1)     | 1(2)     |
| C(4)  | 39(2)    | 26(2)    | 39(3)    | 8(2)     | 1(2)     | -6(2)    |
| C(5)  | 28(2)    | 17(2)    | 32(2)    | 1(2)     | -3(2)    | -1(2)    |
| C(6)  | 19(2)    | 28(2)    | 20(2)    | -3(2)    | 0(2)     | 5(2)     |
| C(7)  | 24(2)    | 32(2)    | 23(2)    | 4(2)     | 8(2)     | 3(2)     |
| C(8)  | 40(2)    | 35(2)    | 25(2)    | 7(2)     | 6(2)     | 6(2)     |
| C(9)  | 41(2)    | 35(2)    | 26(2)    | 1(2)     | -6(2)    | 18(2)    |
| C(10) | 23(2)    | 41(2)    | 42(3)    | -12(2)   | -9(2)    | 11(2)    |
| C(11) | 26(2)    | 30(2)    | 34(3)    | -3(2)    | -5(2)    | 3(2)     |
| C(12) | 52(3)    | 32(2)    | 60(3)    | 13(2)    | -26(2)   | -4(2)    |
| C(13) | 67(3)    | 27(2)    | 58(3)    | -1(2)    | 27(3)    | 7(2)     |
| C(14) | 18(2)    | 21(2)    | 33(2)    | 2(2)     | 0(2)     | 1(1)     |
| C(15) | 20(2)    | 33(2)    | 35(2)    | -7(2)    | -6(2)    | 1(2)     |
| C(16) | 25(2)    | 21(2)    | 27(2)    | -2(2)    | -4(2)    | -2(2)    |
| C(17) | 34(2)    | 37(2)    | 30(2)    | -10(2)   | 2(2)     | -2(2)    |
| C(18) | 26(2)    | 26(2)    | 27(2)    | -7(2)    | 3(2)     | -3(2)    |
| C(19) | 16(2)    | 31(2)    | 36(3)    | -10(2)   | -1(2)    | -4(2)    |
| C(20) | 20(2)    | 48(3)    | 45(3)    | -8(2)    | 6(2)     | -6(2)    |
| C(21) | 35(2)    | 64(3)    | 48(3)    | -16(2)   | 16(2)    | -13(2)   |
| C(22) | 30(2)    | 49(3)    | 80(4)    | -37(3)   | 26(3)    | -16(2)   |
| C(23) | 24(2)    | 44(3)    | 84(4)    | -35(3)   | 2(2)     | 2(2)     |
| C(24) | 29(2)    | 36(2)    | 50(3)    | -19(2)   | -7(2)    | 3(2)     |

|       |       |       |       |       |       |        |
|-------|-------|-------|-------|-------|-------|--------|
| C(25) | 39(2) | 42(2) | 34(3) | -6(2) | 14(2) | -13(2) |
| C(26) | 37(2) | 23(2) | 46(3) | -6(2) | 3(2)  | 1(2)   |

---

Table 5. Hydrogen coordinates ( $\times 10^4$ ) and isotropic displacement parameters ( $\text{\AA}^2 \times 10^{-3}$ ) for d1837\_a.

|        | x     | y     | z    | U(eq) |
|--------|-------|-------|------|-------|
| H(2A)  | 6108  | 8260  | 6251 | 32    |
| H(4A)  | 4388  | 11528 | 5185 | 42    |
| H(4B)  | 4416  | 12323 | 5870 | 42    |
| H(7A)  | 4446  | 4368  | 6808 | 32    |
| H(8A)  | 5566  | 2606  | 7227 | 40    |
| H(9A)  | 7465  | 2949  | 7370 | 41    |
| H(10A) | 8240  | 5054  | 7102 | 43    |
| H(11A) | 7132  | 6834  | 6683 | 36    |
| H(12A) | 1761  | 10199 | 5349 | 73    |
| H(12B) | 2788  | 10222 | 4881 | 73    |
| H(12C) | 2245  | 11643 | 5108 | 73    |
| H(13A) | 2053  | 10942 | 6510 | 75    |
| H(13B) | 2570  | 12389 | 6298 | 75    |
| H(13C) | 3268  | 11375 | 6770 | 75    |
| H(15A) | -782  | 7736  | 5638 | 35    |
| H(17A) | 1340  | 6854  | 4043 | 40    |
| H(17B) | 1099  | 5254  | 4202 | 40    |
| H(20A) | 305   | 8155  | 7634 | 45    |
| H(21A) | -937  | 9076  | 8359 | 59    |
| H(22A) | -2517 | 10228 | 7964 | 63    |
| H(23A) | -2846 | 10477 | 6858 | 61    |
| H(24A) | -1594 | 9581  | 6134 | 46    |
| H(25A) | 3831  | 6888  | 4951 | 57    |
| H(25B) | 3053  | 7788  | 4469 | 57    |
| H(25C) | 3499  | 6313  | 4243 | 57    |
| H(26A) | 3059  | 4747  | 5464 | 54    |
| H(26B) | 2774  | 4162  | 4753 | 54    |
| H(26C) | 1822  | 4272  | 5269 | 54    |



Table 6. Torsion angles [°] for d1837\_a.

---

|                       |           |
|-----------------------|-----------|
| C(5)-N(1)-C(1)-O(2)   | -3.5(4)   |
| Ni(1)-N(1)-C(1)-O(2)  | 178.2(2)  |
| C(5)-N(1)-C(1)-C(2)   | 176.1(3)  |
| Ni(1)-N(1)-C(1)-C(2)  | -2.3(5)   |
| C(4)-O(2)-C(1)-N(1)   | -6.0(4)   |
| C(4)-O(2)-C(1)-C(2)   | 174.4(3)  |
| N(1)-C(1)-C(2)-C(3)   | -2.3(6)   |
| O(2)-C(1)-C(2)-C(3)   | 177.2(3)  |
| Ni(1)-O(1)-C(3)-C(2)  | -2.6(5)   |
| Ni(1)-O(1)-C(3)-C(6)  | 176.9(2)  |
| C(1)-C(2)-C(3)-O(1)   | 4.9(6)    |
| C(1)-C(2)-C(3)-C(6)   | -174.6(3) |
| C(1)-O(2)-C(4)-C(5)   | 12.3(4)   |
| C(1)-N(1)-C(5)-C(12)  | 128.9(3)  |
| Ni(1)-N(1)-C(5)-C(12) | -52.9(4)  |
| C(1)-N(1)-C(5)-C(13)  | -106.7(3) |
| Ni(1)-N(1)-C(5)-C(13) | 71.6(4)   |
| C(1)-N(1)-C(5)-C(4)   | 10.6(4)   |
| Ni(1)-N(1)-C(5)-C(4)  | -171.1(2) |
| O(2)-C(4)-C(5)-N(1)   | -13.6(4)  |
| O(2)-C(4)-C(5)-C(12)  | -130.8(3) |
| O(2)-C(4)-C(5)-C(13)  | 102.5(3)  |
| O(1)-C(3)-C(6)-C(7)   | 2.3(5)    |
| C(2)-C(3)-C(6)-C(7)   | -178.1(3) |
| O(1)-C(3)-C(6)-C(11)  | -176.2(3) |
| C(2)-C(3)-C(6)-C(11)  | 3.4(5)    |
| C(11)-C(6)-C(7)-C(8)  | -0.5(5)   |
| C(3)-C(6)-C(7)-C(8)   | -179.0(3) |
| C(6)-C(7)-C(8)-C(9)   | 0.1(5)    |
| C(7)-C(8)-C(9)-C(10)  | 0.3(6)    |
| C(8)-C(9)-C(10)-C(11) | -0.2(6)   |
| C(9)-C(10)-C(11)-C(6) | -0.2(6)   |
| C(7)-C(6)-C(11)-C(10) | 0.5(5)    |
| C(3)-C(6)-C(11)-C(10) | 179.0(3)  |

|                         |           |
|-------------------------|-----------|
| Ni(1)-O(3)-C(14)-C(15)  | 6.3(5)    |
| Ni(1)-O(3)-C(14)-C(19)  | -173.9(2) |
| O(3)-C(14)-C(15)-C(16)  | 1.6(5)    |
| C(19)-C(14)-C(15)-C(16) | -178.1(3) |
| C(18)-N(2)-C(16)-O(4)   | -5.1(4)   |
| Ni(1)-N(2)-C(16)-O(4)   | 175.1(2)  |
| C(18)-N(2)-C(16)-C(15)  | 174.2(3)  |
| Ni(1)-N(2)-C(16)-C(15)  | -5.5(5)   |
| C(17)-O(4)-C(16)-N(2)   | -6.6(4)   |
| C(17)-O(4)-C(16)-C(15)  | 174.0(3)  |
| C(14)-C(15)-C(16)-N(2)  | -1.9(6)   |
| C(14)-C(15)-C(16)-O(4)  | 177.5(3)  |
| C(16)-O(4)-C(17)-C(18)  | 14.7(3)   |
| C(16)-N(2)-C(18)-C(26)  | -104.4(3) |
| Ni(1)-N(2)-C(18)-C(26)  | 75.3(3)   |
| C(16)-N(2)-C(18)-C(25)  | 133.4(3)  |
| Ni(1)-N(2)-C(18)-C(25)  | -46.9(4)  |
| C(16)-N(2)-C(18)-C(17)  | 13.6(3)   |
| Ni(1)-N(2)-C(18)-C(17)  | -166.7(2) |
| O(4)-C(17)-C(18)-N(2)   | -16.7(3)  |
| O(4)-C(17)-C(18)-C(26)  | 99.1(3)   |
| O(4)-C(17)-C(18)-C(25)  | -135.2(3) |
| O(3)-C(14)-C(19)-C(20)  | -32.1(4)  |
| C(15)-C(14)-C(19)-C(20) | 147.7(3)  |
| O(3)-C(14)-C(19)-C(24)  | 146.7(3)  |
| C(15)-C(14)-C(19)-C(24) | -33.5(5)  |
| C(24)-C(19)-C(20)-C(21) | 0.0(5)    |
| C(14)-C(19)-C(20)-C(21) | 178.9(3)  |
| C(19)-C(20)-C(21)-C(22) | 0.4(6)    |
| C(20)-C(21)-C(22)-C(23) | -0.3(6)   |
| C(21)-C(22)-C(23)-C(24) | -0.1(6)   |
| C(20)-C(19)-C(24)-C(23) | -0.4(5)   |
| C(14)-C(19)-C(24)-C(23) | -179.3(3) |
| C(22)-C(23)-C(24)-C(19) | 0.5(6)    |

---

Symmetry transformations used to generate equivalent atoms:



## Complex 3b

Table 1. Crystal data and structure refinement for d1839\_a.

|                                   |                                                                  |                 |
|-----------------------------------|------------------------------------------------------------------|-----------------|
| Identification code               | d1839_a                                                          |                 |
| Empirical formula                 | C <sub>22</sub> H <sub>24</sub> N <sub>2</sub> Ni O <sub>6</sub> |                 |
| Formula weight                    | 471.14                                                           |                 |
| Temperature                       | 150(2) K                                                         |                 |
| Wavelength                        | 0.71073 Å                                                        |                 |
| Crystal system                    | Monoclinic                                                       |                 |
| Space group                       | P2 <sub>1</sub> /c                                               |                 |
| Unit cell dimensions              | a = 10.2574(8) Å                                                 | α = 90°.        |
|                                   | b = 8.8952(7) Å                                                  | β = 95.190(3)°. |
|                                   | c = 23.418(2) Å                                                  | γ = 90°.        |
| Volume                            | 2127.9(3) Å <sup>3</sup>                                         |                 |
| Z                                 | 4                                                                |                 |
| Density (calculated)              | 1.471 Mg/m <sup>3</sup>                                          |                 |
| Absorption coefficient            | 0.953 mm <sup>-1</sup>                                           |                 |
| F(000)                            | 984                                                              |                 |
| Crystal size                      | 0.180 x 0.160 x 0.050 mm <sup>3</sup>                            |                 |
| Theta range for data collection   | 1.746 to 27.559°.                                                |                 |
| Index ranges                      | -13 ≤ h ≤ 13, -11 ≤ k ≤ 11, -30 ≤ l ≤ 30                         |                 |
| Reflections collected             | 33572                                                            |                 |
| Independent reflections           | 4920 [R(int) = 0.0562]                                           |                 |
| Completeness to theta = 25.242°   | 100.0 %                                                          |                 |
| Absorption correction             | Semi-empirical from equivalents                                  |                 |
| Max. and min. transmission        | 0.7456 and 0.6985                                                |                 |
| Refinement method                 | Full-matrix least-squares on F <sup>2</sup>                      |                 |
| Data / restraints / parameters    | 4920 / 0 / 284                                                   |                 |
| Goodness-of-fit on F <sup>2</sup> | 1.001                                                            |                 |
| Final R indices [I > 2σ(I)]       | R1 = 0.0324, wR2 = 0.0643                                        |                 |
| R indices (all data)              | R1 = 0.0548, wR2 = 0.0714                                        |                 |
| Extinction coefficient            | n/a                                                              |                 |
| Largest diff. peak and hole       | 0.333 and -0.320 e.Å <sup>-3</sup>                               |                 |

Table 2. Atomic coordinates ( $\times 10^4$ ) and equivalent isotropic displacement parameters ( $\text{\AA}^2 \times 10^3$ ) for d1839\_a.  $U(\text{eq})$  is defined as one third of the trace of the orthogonalized  $U^{ij}$  tensor.

|       | x       | y       | z       | $U(\text{eq})$ |
|-------|---------|---------|---------|----------------|
| Ni(1) | 2924(1) | 3758(1) | 2937(1) | 16(1)          |
| O(1)  | 2763(1) | 3494(1) | 2115(1) | 18(1)          |
| O(2)  | 6505(1) | 1845(2) | 2759(1) | 24(1)          |
| O(3)  | 4206(1) | 2534(2) | 840(1)  | 25(1)          |
| O(4)  | 2665(1) | 5258(1) | 3510(1) | 19(1)          |
| O(5)  | -10(1)  | 1710(2) | 3740(1) | 23(1)          |
| O(6)  | 1051(2) | 6630(2) | 4695(1) | 29(1)          |
| N(1)  | 4710(2) | 2968(2) | 3041(1) | 16(1)          |
| N(2)  | 1533(2) | 2475(2) | 3182(1) | 17(1)          |
| C(1)  | 3657(2) | 2941(2) | 1815(1) | 17(1)          |
| C(2)  | 4874(2) | 2453(2) | 2023(1) | 19(1)          |
| C(3)  | 5314(2) | 2465(2) | 2613(1) | 18(1)          |
| C(4)  | 6802(2) | 2079(2) | 3366(1) | 25(1)          |
| C(5)  | 5504(2) | 2600(2) | 3588(1) | 19(1)          |
| C(6)  | 3246(2) | 2796(2) | 1202(1) | 19(1)          |
| C(7)  | 2061(2) | 2746(3) | 900(1)  | 31(1)          |
| C(8)  | 2286(3) | 2423(3) | 321(1)  | 36(1)          |
| C(9)  | 3576(2) | 2308(2) | 309(1)  | 32(1)          |
| C(10) | 5696(2) | 3974(2) | 3971(1) | 27(1)          |
| C(11) | 4841(2) | 1334(2) | 3890(1) | 25(1)          |
| C(12) | 1822(2) | 5222(2) | 3891(1) | 17(1)          |
| C(13) | 945(2)  | 4093(2) | 3962(1) | 19(1)          |
| C(14) | 869(2)  | 2784(2) | 3616(1) | 17(1)          |
| C(15) | 247(2)  | 408(2)  | 3390(1) | 24(1)          |
| C(16) | 1036(2) | 1034(2) | 2918(1) | 20(1)          |
| C(17) | 1890(2) | 6543(2) | 4270(1) | 18(1)          |
| C(18) | 2666(2) | 7768(2) | 4291(1) | 24(1)          |
| C(19) | 2306(2) | 8682(2) | 4749(1) | 28(1)          |
| C(20) | 1339(2) | 7954(3) | 4978(1) | 32(1)          |
| C(21) | 159(2)  | 1373(2) | 2374(1) | 29(1)          |
| C(22) | 2166(2) | 18(2)   | 2787(1) | 29(1)          |

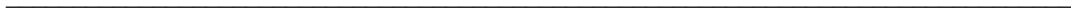

Table 3. Bond lengths [Å] and angles [°] for d1839\_a.

---

|              |            |
|--------------|------------|
| Ni(1)-O(4)   | 1.9272(13) |
| Ni(1)-O(1)   | 1.9325(13) |
| Ni(1)-N(2)   | 1.9531(16) |
| Ni(1)-N(1)   | 1.9560(16) |
| O(1)-C(1)    | 1.301(2)   |
| O(2)-C(3)    | 1.356(2)   |
| O(2)-C(4)    | 1.443(2)   |
| O(3)-C(9)    | 1.364(3)   |
| O(3)-C(6)    | 1.376(2)   |
| O(4)-C(12)   | 1.298(2)   |
| O(5)-C(14)   | 1.362(2)   |
| O(5)-C(15)   | 1.457(2)   |
| O(6)-C(20)   | 1.370(2)   |
| O(6)-C(17)   | 1.375(2)   |
| N(1)-C(3)    | 1.304(2)   |
| N(1)-C(5)    | 1.492(2)   |
| N(2)-C(14)   | 1.303(2)   |
| N(2)-C(16)   | 1.493(2)   |
| C(1)-C(2)    | 1.368(3)   |
| C(1)-C(6)    | 1.466(3)   |
| C(2)-C(3)    | 1.414(3)   |
| C(2)-H(2A)   | 0.9500     |
| C(4)-C(5)    | 1.544(3)   |
| C(4)-H(4A)   | 0.9900     |
| C(4)-H(4B)   | 0.9900     |
| C(5)-C(10)   | 1.518(3)   |
| C(5)-C(11)   | 1.522(3)   |
| C(6)-C(7)    | 1.350(3)   |
| C(7)-C(8)    | 1.426(3)   |
| C(7)-H(7A)   | 0.9500     |
| C(8)-C(9)    | 1.329(3)   |
| C(8)-H(8A)   | 0.9500     |
| C(9)-H(9A)   | 0.9500     |
| C(10)-H(10A) | 0.9800     |

|                 |            |
|-----------------|------------|
| C(10)-H(10B)    | 0.9800     |
| C(10)-H(10C)    | 0.9800     |
| C(11)-H(11A)    | 0.9800     |
| C(11)-H(11B)    | 0.9800     |
| C(11)-H(11C)    | 0.9800     |
| C(12)-C(13)     | 1.369(3)   |
| C(12)-C(17)     | 1.470(3)   |
| C(13)-C(14)     | 1.417(3)   |
| C(13)-H(13A)    | 0.9500     |
| C(15)-C(16)     | 1.534(3)   |
| C(15)-H(15A)    | 0.9900     |
| C(15)-H(15B)    | 0.9900     |
| C(16)-C(21)     | 1.521(3)   |
| C(16)-C(22)     | 1.522(3)   |
| C(17)-C(18)     | 1.348(3)   |
| C(18)-C(19)     | 1.422(3)   |
| C(18)-H(18A)    | 0.9500     |
| C(19)-C(20)     | 1.336(3)   |
| C(19)-H(19A)    | 0.9500     |
| C(20)-H(20A)    | 0.9500     |
| C(21)-H(21A)    | 0.9800     |
| C(21)-H(21B)    | 0.9800     |
| C(21)-H(21C)    | 0.9800     |
| C(22)-H(22A)    | 0.9800     |
| C(22)-H(22B)    | 0.9800     |
| C(22)-H(22C)    | 0.9800     |
| O(4)-Ni(1)-O(1) | 140.61(6)  |
| O(4)-Ni(1)-N(2) | 92.89(6)   |
| O(1)-Ni(1)-N(2) | 102.81(6)  |
| O(4)-Ni(1)-N(1) | 110.44(6)  |
| O(1)-Ni(1)-N(1) | 94.29(6)   |
| N(2)-Ni(1)-N(1) | 117.02(7)  |
| C(1)-O(1)-Ni(1) | 125.60(12) |
| C(3)-O(2)-C(4)  | 107.11(14) |
| C(9)-O(3)-C(6)  | 106.20(17) |



|                  |            |
|------------------|------------|
| C(12)-O(4)-Ni(1) | 127.12(12) |
| C(14)-O(5)-C(15) | 106.29(14) |
| C(20)-O(6)-C(17) | 106.05(16) |
| C(3)-N(1)-C(5)   | 108.94(16) |
| C(3)-N(1)-Ni(1)  | 122.19(13) |
| C(5)-N(1)-Ni(1)  | 128.15(12) |
| C(14)-N(2)-C(16) | 108.72(15) |
| C(14)-N(2)-Ni(1) | 123.58(13) |
| C(16)-N(2)-Ni(1) | 127.70(12) |
| O(1)-C(1)-C(2)   | 126.38(18) |
| O(1)-C(1)-C(6)   | 114.01(17) |
| C(2)-C(1)-C(6)   | 119.56(17) |
| C(1)-C(2)-C(3)   | 123.08(17) |
| C(1)-C(2)-H(2A)  | 118.5      |
| C(3)-C(2)-H(2A)  | 118.5      |
| N(1)-C(3)-O(2)   | 115.25(17) |
| N(1)-C(3)-C(2)   | 128.40(18) |
| O(2)-C(3)-C(2)   | 116.33(16) |
| O(2)-C(4)-C(5)   | 105.32(16) |
| O(2)-C(4)-H(4A)  | 110.7      |
| C(5)-C(4)-H(4A)  | 110.7      |
| O(2)-C(4)-H(4B)  | 110.7      |
| C(5)-C(4)-H(4B)  | 110.7      |
| H(4A)-C(4)-H(4B) | 108.8      |
| N(1)-C(5)-C(10)  | 111.23(16) |
| N(1)-C(5)-C(11)  | 109.23(16) |
| C(10)-C(5)-C(11) | 111.18(17) |
| N(1)-C(5)-C(4)   | 101.34(15) |
| C(10)-C(5)-C(4)  | 111.76(17) |
| C(11)-C(5)-C(4)  | 111.70(16) |
| C(7)-C(6)-O(3)   | 109.44(18) |
| C(7)-C(6)-C(1)   | 133.00(19) |
| O(3)-C(6)-C(1)   | 117.33(17) |
| C(6)-C(7)-C(8)   | 106.8(2)   |
| C(6)-C(7)-H(7A)  | 126.6      |
| C(8)-C(7)-H(7A)  | 126.6      |

|                     |            |
|---------------------|------------|
| C(9)-C(8)-C(7)      | 106.4(2)   |
| C(9)-C(8)-H(8A)     | 126.8      |
| C(7)-C(8)-H(8A)     | 126.8      |
| C(8)-C(9)-O(3)      | 111.13(19) |
| C(8)-C(9)-H(9A)     | 124.4      |
| O(3)-C(9)-H(9A)     | 124.4      |
| C(5)-C(10)-H(10A)   | 109.5      |
| C(5)-C(10)-H(10B)   | 109.5      |
| H(10A)-C(10)-H(10B) | 109.5      |
| C(5)-C(10)-H(10C)   | 109.5      |
| H(10A)-C(10)-H(10C) | 109.5      |
| H(10B)-C(10)-H(10C) | 109.5      |
| C(5)-C(11)-H(11A)   | 109.5      |
| C(5)-C(11)-H(11B)   | 109.5      |
| H(11A)-C(11)-H(11B) | 109.5      |
| C(5)-C(11)-H(11C)   | 109.5      |
| H(11A)-C(11)-H(11C) | 109.5      |
| H(11B)-C(11)-H(11C) | 109.5      |
| O(4)-C(12)-C(13)    | 126.02(17) |
| O(4)-C(12)-C(17)    | 113.40(16) |
| C(13)-C(12)-C(17)   | 120.57(17) |
| C(12)-C(13)-C(14)   | 122.44(17) |
| C(12)-C(13)-H(13A)  | 118.8      |
| C(14)-C(13)-H(13A)  | 118.8      |
| N(2)-C(14)-O(5)     | 114.96(16) |
| N(2)-C(14)-C(13)    | 127.84(18) |
| O(5)-C(14)-C(13)    | 117.19(16) |
| O(5)-C(15)-C(16)    | 104.55(15) |
| O(5)-C(15)-H(15A)   | 110.8      |
| C(16)-C(15)-H(15A)  | 110.8      |
| O(5)-C(15)-H(15B)   | 110.8      |
| C(16)-C(15)-H(15B)  | 110.8      |
| H(15A)-C(15)-H(15B) | 108.9      |
| N(2)-C(16)-C(21)    | 109.27(16) |
| N(2)-C(16)-C(22)    | 110.80(16) |
| C(21)-C(16)-C(22)   | 110.72(17) |

|                     |            |
|---------------------|------------|
| N(2)-C(16)-C(15)    | 101.25(15) |
| C(21)-C(16)-C(15)   | 111.43(17) |
| C(22)-C(16)-C(15)   | 112.96(17) |
| C(18)-C(17)-O(6)    | 109.56(16) |
| C(18)-C(17)-C(12)   | 131.54(17) |
| O(6)-C(17)-C(12)    | 118.90(16) |
| C(17)-C(18)-C(19)   | 107.26(18) |
| C(17)-C(18)-H(18A)  | 126.4      |
| C(19)-C(18)-H(18A)  | 126.4      |
| C(20)-C(19)-C(18)   | 106.13(19) |
| C(20)-C(19)-H(19A)  | 126.9      |
| C(18)-C(19)-H(19A)  | 126.9      |
| C(19)-C(20)-O(6)    | 111.01(18) |
| C(19)-C(20)-H(20A)  | 124.5      |
| O(6)-C(20)-H(20A)   | 124.5      |
| C(16)-C(21)-H(21A)  | 109.5      |
| C(16)-C(21)-H(21B)  | 109.5      |
| H(21A)-C(21)-H(21B) | 109.5      |
| C(16)-C(21)-H(21C)  | 109.5      |
| H(21A)-C(21)-H(21C) | 109.5      |
| H(21B)-C(21)-H(21C) | 109.5      |
| C(16)-C(22)-H(22A)  | 109.5      |
| C(16)-C(22)-H(22B)  | 109.5      |
| H(22A)-C(22)-H(22B) | 109.5      |
| C(16)-C(22)-H(22C)  | 109.5      |
| H(22A)-C(22)-H(22C) | 109.5      |
| H(22B)-C(22)-H(22C) | 109.5      |

---

Symmetry transformations used to generate equivalent atoms:

Table 4. Anisotropic displacement parameters ( $\text{\AA}^2 \times 10^3$ ) for d1839\_a. The anisotropic displacement factor exponent takes the form:  $-2\pi^2 [ h^2 a^{*2} U^{11} + \dots + 2 h k a^* b^* U^{12} ]$

|       | U <sup>11</sup> | U <sup>22</sup> | U <sup>33</sup> | U <sup>23</sup> | U <sup>13</sup> | U <sup>12</sup> |
|-------|-----------------|-----------------|-----------------|-----------------|-----------------|-----------------|
| Ni(1) | 15(1)           | 19(1)           | 16(1)           | -4(1)           | 4(1)            | 1(1)            |
| O(1)  | 18(1)           | 21(1)           | 17(1)           | -3(1)           | 4(1)            | 2(1)            |
| O(2)  | 18(1)           | 30(1)           | 24(1)           | 4(1)            | 5(1)            | 8(1)            |
| O(3)  | 32(1)           | 28(1)           | 17(1)           | 2(1)            | 10(1)           | 3(1)            |
| O(4)  | 19(1)           | 20(1)           | 18(1)           | -4(1)           | 6(1)            | 0(1)            |
| O(5)  | 23(1)           | 22(1)           | 25(1)           | -2(1)           | 9(1)            | -6(1)           |
| O(6)  | 32(1)           | 31(1)           | 27(1)           | -13(1)          | 16(1)           | -7(1)           |
| N(1)  | 17(1)           | 16(1)           | 16(1)           | 0(1)            | 2(1)            | 0(1)            |
| N(2)  | 17(1)           | 15(1)           | 19(1)           | -3(1)           | 2(1)            | 0(1)            |
| C(1)  | 21(1)           | 13(1)           | 17(1)           | -1(1)           | 6(1)            | -4(1)           |
| C(2)  | 20(1)           | 19(1)           | 18(1)           | 0(1)            | 7(1)            | 1(1)            |
| C(3)  | 15(1)           | 14(1)           | 25(1)           | 2(1)            | 5(1)            | 0(1)            |
| C(4)  | 21(1)           | 31(1)           | 23(1)           | 3(1)            | -1(1)           | 2(1)            |
| C(5)  | 19(1)           | 20(1)           | 18(1)           | 1(1)            | -1(1)           | 1(1)            |
| C(6)  | 24(1)           | 15(1)           | 20(1)           | -1(1)           | 7(1)            | 0(1)            |
| C(7)  | 29(1)           | 40(1)           | 23(1)           | -6(1)           | 2(1)            | 3(1)            |
| C(8)  | 44(2)           | 42(1)           | 20(1)           | -6(1)           | -3(1)           | 4(1)            |
| C(9)  | 53(2)           | 30(1)           | 14(1)           | -1(1)           | 8(1)            | 5(1)            |
| C(10) | 29(1)           | 22(1)           | 27(1)           | -3(1)           | -6(1)           | 0(1)            |
| C(11) | 27(1)           | 24(1)           | 23(1)           | 4(1)            | 0(1)            | -1(1)           |
| C(12) | 17(1)           | 20(1)           | 12(1)           | 0(1)            | 0(1)            | 5(1)            |
| C(13) | 18(1)           | 24(1)           | 15(1)           | -1(1)           | 4(1)            | 1(1)            |
| C(14) | 13(1)           | 20(1)           | 18(1)           | 2(1)            | 1(1)            | 1(1)            |
| C(15) | 22(1)           | 19(1)           | 29(1)           | -3(1)           | 4(1)            | -2(1)           |
| C(16) | 17(1)           | 17(1)           | 24(1)           | -5(1)           | 2(1)            | -3(1)           |
| C(17) | 18(1)           | 22(1)           | 14(1)           | -3(1)           | 4(1)            | 3(1)            |
| C(18) | 23(1)           | 24(1)           | 25(1)           | -4(1)           | 7(1)            | 0(1)            |
| C(19) | 31(1)           | 25(1)           | 28(1)           | -10(1)          | 1(1)            | -1(1)           |
| C(20) | 39(1)           | 35(1)           | 25(1)           | -17(1)          | 11(1)           | -4(1)           |
| C(21) | 29(1)           | 29(1)           | 28(1)           | -5(1)           | -4(1)           | -5(1)           |
| C(22) | 24(1)           | 19(1)           | 46(1)           | -10(1)          | 10(1)           | -2(1)           |

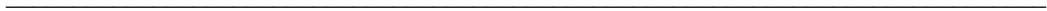

Table 5. Hydrogen coordinates ( $\times 10^4$ ) and isotropic displacement parameters ( $\text{\AA}^2 \times 10^{-3}$ ) for d1839\_a.

|        | x    | y    | z    | U(eq) |
|--------|------|------|------|-------|
| H(2A)  | 5449 | 2088 | 1759 | 23    |
| H(4A)  | 7487 | 2857 | 3438 | 30    |
| H(4B)  | 7111 | 1135 | 3557 | 30    |
| H(7A)  | 1236 | 2896 | 1046 | 37    |
| H(8A)  | 1642 | 2312 | 6    | 43    |
| H(9A)  | 4002 | 2096 | -25  | 38    |
| H(10A) | 4843 | 4329 | 4073 | 40    |
| H(10B) | 6122 | 4770 | 3766 | 40    |
| H(10C) | 6247 | 3709 | 4320 | 40    |
| H(11A) | 3969 | 1661 | 3978 | 37    |
| H(11B) | 5368 | 1076 | 4247 | 37    |
| H(11C) | 4759 | 450  | 3639 | 37    |
| H(13A) | 365  | 4191 | 4254 | 23    |
| H(15A) | -582 | -50  | 3224 | 28    |
| H(15B) | 758  | -360 | 3621 | 28    |
| H(18A) | 3329 | 7981 | 4045 | 28    |
| H(19A) | 2679 | 9620 | 4869 | 33    |
| H(20A) | 908  | 8308 | 5294 | 39    |
| H(21A) | 650  | 1957 | 2110 | 44    |
| H(21B) | -603 | 1953 | 2471 | 44    |
| H(21C) | -136 | 428  | 2190 | 44    |
| H(22A) | 2675 | 507  | 2505 | 44    |
| H(22B) | 1820 | -940 | 2632 | 44    |
| H(22C) | 2731 | -167 | 3140 | 44    |

Table 6. Torsion angles [°] for d1839\_a.

---

|                        |             |
|------------------------|-------------|
| Ni(1)-O(1)-C(1)-C(2)   | -0.3(3)     |
| Ni(1)-O(1)-C(1)-C(6)   | 176.94(12)  |
| O(1)-C(1)-C(2)-C(3)    | 1.2(3)      |
| C(6)-C(1)-C(2)-C(3)    | -175.93(17) |
| C(5)-N(1)-C(3)-O(2)    | -4.0(2)     |
| Ni(1)-N(1)-C(3)-O(2)   | -174.96(12) |
| C(5)-N(1)-C(3)-C(2)    | 174.29(18)  |
| Ni(1)-N(1)-C(3)-C(2)   | 3.3(3)      |
| C(4)-O(2)-C(3)-N(1)    | -5.8(2)     |
| C(4)-O(2)-C(3)-C(2)    | 175.71(17)  |
| C(1)-C(2)-C(3)-N(1)    | -2.9(3)     |
| C(1)-C(2)-C(3)-O(2)    | 175.31(17)  |
| C(3)-O(2)-C(4)-C(5)    | 12.5(2)     |
| C(3)-N(1)-C(5)-C(10)   | 130.00(18)  |
| Ni(1)-N(1)-C(5)-C(10)  | -59.7(2)    |
| C(3)-N(1)-C(5)-C(11)   | -106.90(18) |
| Ni(1)-N(1)-C(5)-C(11)  | 63.4(2)     |
| C(3)-N(1)-C(5)-C(4)    | 11.1(2)     |
| Ni(1)-N(1)-C(5)-C(4)   | -178.61(13) |
| O(2)-C(4)-C(5)-N(1)    | -13.95(19)  |
| O(2)-C(4)-C(5)-C(10)   | -132.48(17) |
| O(2)-C(4)-C(5)-C(11)   | 102.24(18)  |
| C(9)-O(3)-C(6)-C(7)    | -0.6(2)     |
| C(9)-O(3)-C(6)-C(1)    | 174.61(17)  |
| O(1)-C(1)-C(6)-C(7)    | -20.0(3)    |
| C(2)-C(1)-C(6)-C(7)    | 157.5(2)    |
| O(1)-C(1)-C(6)-O(3)    | 166.25(15)  |
| C(2)-C(1)-C(6)-O(3)    | -16.3(3)    |
| O(3)-C(6)-C(7)-C(8)    | 0.6(2)      |
| C(1)-C(6)-C(7)-C(8)    | -173.6(2)   |
| C(6)-C(7)-C(8)-C(9)    | -0.3(3)     |
| C(7)-C(8)-C(9)-O(3)    | 0.0(3)      |
| C(6)-O(3)-C(9)-C(8)    | 0.4(2)      |
| Ni(1)-O(4)-C(12)-C(13) | 0.2(3)      |

|                         |             |
|-------------------------|-------------|
| Ni(1)-O(4)-C(12)-C(17)  | 179.26(12)  |
| O(4)-C(12)-C(13)-C(14)  | 0.6(3)      |
| C(17)-C(12)-C(13)-C(14) | -178.38(18) |
| C(16)-N(2)-C(14)-O(5)   | 4.3(2)      |
| Ni(1)-N(2)-C(14)-O(5)   | -176.36(12) |
| C(16)-N(2)-C(14)-C(13)  | -174.89(19) |
| Ni(1)-N(2)-C(14)-C(13)  | 4.5(3)      |
| C(15)-O(5)-C(14)-N(2)   | 9.5(2)      |
| C(15)-O(5)-C(14)-C(13)  | -171.24(17) |
| C(12)-C(13)-C(14)-N(2)  | -3.3(3)     |
| C(12)-C(13)-C(14)-O(5)  | 177.57(18)  |
| C(14)-O(5)-C(15)-C(16)  | -18.4(2)    |
| C(14)-N(2)-C(16)-C(21)  | 102.49(19)  |
| Ni(1)-N(2)-C(16)-C(21)  | -76.82(19)  |
| C(14)-N(2)-C(16)-C(22)  | -135.24(18) |
| Ni(1)-N(2)-C(16)-C(22)  | 45.5(2)     |
| C(14)-N(2)-C(16)-C(15)  | -15.2(2)    |
| Ni(1)-N(2)-C(16)-C(15)  | 165.53(13)  |
| O(5)-C(15)-C(16)-N(2)   | 19.88(19)   |
| O(5)-C(15)-C(16)-C(21)  | -96.20(19)  |
| O(5)-C(15)-C(16)-C(22)  | 138.41(17)  |
| C(20)-O(6)-C(17)-C(18)  | 0.0(2)      |
| C(20)-O(6)-C(17)-C(12)  | 179.61(18)  |
| O(4)-C(12)-C(17)-C(18)  | -0.1(3)     |
| C(13)-C(12)-C(17)-C(18) | 179.1(2)    |
| O(4)-C(12)-C(17)-O(6)   | -179.57(16) |
| C(13)-C(12)-C(17)-O(6)  | -0.4(3)     |
| O(6)-C(17)-C(18)-C(19)  | 0.0(2)      |
| C(12)-C(17)-C(18)-C(19) | -179.6(2)   |
| C(17)-C(18)-C(19)-C(20) | 0.1(3)      |
| C(18)-C(19)-C(20)-O(6)  | -0.1(3)     |
| C(17)-O(6)-C(20)-C(19)  | 0.0(3)      |

---

Symmetry transformations used to generate equivalent atoms:



### Complex 3c.

Table 1. Crystal data and structure refinement for d1833\_a.

|                                   |                                                                  |                 |
|-----------------------------------|------------------------------------------------------------------|-----------------|
| Identification code               | d1833_a                                                          |                 |
| Empirical formula                 | C <sub>26</sub> H <sub>26</sub> N <sub>4</sub> Ni O <sub>8</sub> |                 |
| Formula weight                    | 581.22                                                           |                 |
| Temperature                       | 150(2) K                                                         |                 |
| Wavelength                        | 0.71073 Å                                                        |                 |
| Crystal system                    | Triclinic                                                        |                 |
| Space group                       | P-1                                                              |                 |
| Unit cell dimensions              | a = 9.5476(10) Å                                                 | α = 74.720(3)°. |
|                                   | b = 10.5561(12) Å                                                | β = 70.961(3)°. |
|                                   | c = 14.4705(16) Å                                                | γ = 70.689(3)°. |
| Volume                            | 1281.1(2) Å <sup>3</sup>                                         |                 |
| Z                                 | 2                                                                |                 |
| Density (calculated)              | 1.507 Mg/m <sup>3</sup>                                          |                 |
| Absorption coefficient            | 0.815 mm <sup>-1</sup>                                           |                 |
| F(000)                            | 604                                                              |                 |
| Crystal size                      | 0.200 x 0.180 x 0.110 mm <sup>3</sup>                            |                 |
| Theta range for data collection   | 1.512 to 27.698°.                                                |                 |
| Index ranges                      | -12 ≤ h ≤ 12, -13 ≤ k ≤ 13, -18 ≤ l ≤ 18                         |                 |
| Reflections collected             | 31731                                                            |                 |
| Independent reflections           | 5961 [R(int) = 0.0333]                                           |                 |
| Completeness to theta = 25.242°   | 100.0 %                                                          |                 |
| Absorption correction             | Semi-empirical from equivalents                                  |                 |
| Max. and min. transmission        | 0.7456 and 0.7169                                                |                 |
| Refinement method                 | Full-matrix least-squares on F <sup>2</sup>                      |                 |
| Data / restraints / parameters    | 5961 / 0 / 356                                                   |                 |
| Goodness-of-fit on F <sup>2</sup> | 1.024                                                            |                 |
| Final R indices [I > 2σ(I)]       | R1 = 0.0301, wR2 = 0.0681                                        |                 |
| R indices (all data)              | R1 = 0.0419, wR2 = 0.0733                                        |                 |
| Extinction coefficient            | n/a                                                              |                 |
| Largest diff. peak and hole       | 0.439 and -0.317 e.Å <sup>-3</sup>                               |                 |

Table 2. Atomic coordinates ( $\times 10^4$ ) and equivalent isotropic displacement parameters ( $\text{\AA}^2 \times 10^3$ ) for d1833\_a.  $U(\text{eq})$  is defined as one third of the trace of the orthogonalized  $U^{ij}$  tensor.

|       | x       | y        | z        | $U(\text{eq})$ |
|-------|---------|----------|----------|----------------|
| Ni(1) | 2582(1) | 2283(1)  | 6906(1)  | 17(1)          |
| O(1)  | 2972(1) | 1499(1)  | 8198(1)  | 20(1)          |
| O(2)  | 779(2)  | -1001(1) | 7647(1)  | 28(1)          |
| O(3)  | 4058(2) | 675(1)   | 12768(1) | 34(1)          |
| O(4)  | 3717(2) | -1340(1) | 13155(1) | 28(1)          |
| O(5)  | 3612(1) | 2843(1)  | 5533(1)  | 20(1)          |
| O(6)  | 321(2)  | 6369(1)  | 6534(1)  | 35(1)          |
| O(7)  | 6376(2) | 3687(2)  | 432(1)   | 46(1)          |
| O(8)  | 6587(2) | 5661(1)  | 397(1)   | 35(1)          |
| N(1)  | 1718(2) | 821(1)   | 6951(1)  | 18(1)          |
| N(2)  | 3749(2) | -252(1)  | 12583(1) | 21(1)          |
| N(3)  | 1273(2) | 4132(1)  | 7046(1)  | 19(1)          |
| N(4)  | 6242(2) | 4606(2)  | 847(1)   | 24(1)          |
| C(1)  | 2448(2) | 540(2)   | 8846(1)  | 17(1)          |
| C(2)  | 1670(2) | -225(2)  | 8682(1)  | 21(1)          |
| C(3)  | 1413(2) | -81(2)   | 7740(1)  | 19(1)          |
| C(4)  | 538(3)  | -614(2)  | 6665(1)  | 33(1)          |
| C(5)  | 1343(2) | 514(2)   | 6127(1)  | 21(1)          |
| C(6)  | 2743(2) | 310(2)   | 9843(1)  | 17(1)          |
| C(7)  | 2669(2) | -896(2)  | 10534(1) | 19(1)          |
| C(8)  | 2995(2) | -1077(2) | 11433(1) | 19(1)          |
| C(9)  | 3389(2) | -48(2)   | 11636(1) | 17(1)          |
| C(10) | 3465(2) | 1156(2)  | 10972(1) | 19(1)          |
| C(11) | 3140(2) | 1320(2)  | 10076(1) | 18(1)          |
| C(12) | 299(3)  | 1778(2)  | 5666(2)  | 43(1)          |
| C(13) | 2826(2) | -7(2)    | 5367(2)  | 37(1)          |
| C(14) | 3383(2) | 4062(2)  | 5019(1)  | 18(1)          |
| C(15) | 2368(2) | 5210(2)  | 5363(1)  | 24(1)          |
| C(16) | 1363(2) | 5172(2)  | 6332(1)  | 22(1)          |
| C(17) | -487(3) | 6120(2)  | 7571(2)  | 42(1)          |
| C(18) | -104(2) | 4574(2)  | 7870(1)  | 22(1)          |

|       |          |         |         |       |
|-------|----------|---------|---------|-------|
| C(19) | 4244(2)  | 4191(2) | 3943(1) | 17(1) |
| C(20) | 4702(2)  | 5369(2) | 3416(1) | 19(1) |
| C(21) | 5390(2)  | 5505(2) | 2405(1) | 19(1) |
| C(22) | 5610(2)  | 4447(2) | 1930(1) | 18(1) |
| C(23) | 5216(2)  | 3253(2) | 2431(1) | 23(1) |
| C(24) | 4537(2)  | 3132(2) | 3441(1) | 22(1) |
| C(25) | 246(2)   | 4096(3) | 8880(2) | 41(1) |
| C(26) | -1366(2) | 4006(2) | 7862(2) | 34(1) |

---

Table 3. Bond lengths [Å] and angles [°] for d1833\_a.

---

|            |            |
|------------|------------|
| Ni(1)-O(1) | 1.9362(11) |
| Ni(1)-O(5) | 1.9377(11) |
| Ni(1)-N(1) | 1.9547(14) |
| Ni(1)-N(3) | 1.9597(14) |
| O(1)-C(1)  | 1.2976(19) |
| O(2)-C(3)  | 1.356(2)   |
| O(2)-C(4)  | 1.445(2)   |
| O(3)-N(2)  | 1.2238(18) |
| O(4)-N(2)  | 1.2291(18) |
| O(5)-C(14) | 1.2927(19) |
| O(6)-C(16) | 1.358(2)   |
| O(6)-C(17) | 1.445(2)   |
| O(7)-N(4)  | 1.2222(19) |
| O(8)-N(4)  | 1.2226(19) |
| N(1)-C(3)  | 1.300(2)   |
| N(1)-C(5)  | 1.488(2)   |
| N(2)-C(9)  | 1.465(2)   |
| N(3)-C(16) | 1.299(2)   |
| N(3)-C(18) | 1.494(2)   |
| N(4)-C(22) | 1.469(2)   |
| C(1)-C(2)  | 1.369(2)   |
| C(1)-C(6)  | 1.501(2)   |
| C(2)-C(3)  | 1.423(2)   |
| C(2)-H(2A) | 0.9500     |
| C(4)-C(5)  | 1.530(3)   |
| C(4)-H(4A) | 0.9900     |
| C(4)-H(4B) | 0.9900     |
| C(5)-C(12) | 1.518(3)   |
| C(5)-C(13) | 1.518(3)   |
| C(6)-C(11) | 1.391(2)   |
| C(6)-C(7)  | 1.403(2)   |
| C(7)-C(8)  | 1.386(2)   |
| C(7)-H(7A) | 0.9500     |
| C(8)-C(9)  | 1.385(2)   |

|              |          |
|--------------|----------|
| C(8)-H(8A)   | 0.9500   |
| C(9)-C(10)   | 1.384(2) |
| C(10)-C(11)  | 1.384(2) |
| C(10)-H(10A) | 0.9500   |
| C(11)-H(11A) | 0.9500   |
| C(12)-H(12A) | 0.9800   |
| C(12)-H(12B) | 0.9800   |
| C(12)-H(12C) | 0.9800   |
| C(13)-H(13A) | 0.9800   |
| C(13)-H(13B) | 0.9800   |
| C(13)-H(13C) | 0.9800   |
| C(14)-C(15)  | 1.372(2) |
| C(14)-C(19)  | 1.499(2) |
| C(15)-C(16)  | 1.416(2) |
| C(15)-H(15A) | 0.9500   |
| C(17)-C(18)  | 1.523(3) |
| C(17)-H(17A) | 0.9900   |
| C(17)-H(17B) | 0.9900   |
| C(18)-C(26)  | 1.517(3) |
| C(18)-C(25)  | 1.523(3) |
| C(19)-C(24)  | 1.394(2) |
| C(19)-C(20)  | 1.401(2) |
| C(20)-C(21)  | 1.385(2) |
| C(20)-H(20A) | 0.9500   |
| C(21)-C(22)  | 1.386(2) |
| C(21)-H(21A) | 0.9500   |
| C(22)-C(23)  | 1.382(2) |
| C(23)-C(24)  | 1.382(2) |
| C(23)-H(23A) | 0.9500   |
| C(24)-H(24A) | 0.9500   |
| C(25)-H(25A) | 0.9800   |
| C(25)-H(25B) | 0.9800   |
| C(25)-H(25C) | 0.9800   |
| C(26)-H(26A) | 0.9800   |
| C(26)-H(26B) | 0.9800   |
| C(26)-H(26C) | 0.9800   |

|                  |            |
|------------------|------------|
| O(1)-Ni(1)-O(5)  | 141.83(5)  |
| O(1)-Ni(1)-N(1)  | 92.16(5)   |
| O(5)-Ni(1)-N(1)  | 107.53(5)  |
| O(1)-Ni(1)-N(3)  | 104.36(5)  |
| O(5)-Ni(1)-N(3)  | 93.04(5)   |
| N(1)-Ni(1)-N(3)  | 121.31(6)  |
| C(1)-O(1)-Ni(1)  | 127.32(11) |
| C(3)-O(2)-C(4)   | 106.79(13) |
| C(14)-O(5)-Ni(1) | 127.15(11) |
| C(16)-O(6)-C(17) | 106.50(14) |
| C(3)-N(1)-C(5)   | 108.79(14) |
| C(3)-N(1)-Ni(1)  | 123.38(11) |
| C(5)-N(1)-Ni(1)  | 127.81(11) |
| O(3)-N(2)-O(4)   | 123.26(14) |
| O(3)-N(2)-C(9)   | 118.25(14) |
| O(4)-N(2)-C(9)   | 118.49(13) |
| C(16)-N(3)-C(18) | 108.08(14) |
| C(16)-N(3)-Ni(1) | 122.88(12) |
| C(18)-N(3)-Ni(1) | 128.40(11) |
| O(7)-N(4)-O(8)   | 122.68(15) |
| O(7)-N(4)-C(22)  | 118.60(14) |
| O(8)-N(4)-C(22)  | 118.70(14) |
| O(1)-C(1)-C(2)   | 125.21(15) |
| O(1)-C(1)-C(6)   | 114.59(14) |
| C(2)-C(1)-C(6)   | 120.19(14) |
| C(1)-C(2)-C(3)   | 122.30(15) |
| C(1)-C(2)-H(2A)  | 118.9      |
| C(3)-C(2)-H(2A)  | 118.9      |
| N(1)-C(3)-O(2)   | 115.57(14) |
| N(1)-C(3)-C(2)   | 128.10(15) |
| O(2)-C(3)-C(2)   | 116.33(14) |
| O(2)-C(4)-C(5)   | 105.81(14) |
| O(2)-C(4)-H(4A)  | 110.6      |
| C(5)-C(4)-H(4A)  | 110.6      |
| O(2)-C(4)-H(4B)  | 110.6      |

|                     |            |
|---------------------|------------|
| C(5)-C(4)-H(4B)     | 110.6      |
| H(4A)-C(4)-H(4B)    | 108.7      |
| N(1)-C(5)-C(12)     | 110.00(14) |
| N(1)-C(5)-C(13)     | 109.12(15) |
| C(12)-C(5)-C(13)    | 111.52(17) |
| N(1)-C(5)-C(4)      | 101.97(13) |
| C(12)-C(5)-C(4)     | 112.58(17) |
| C(13)-C(5)-C(4)     | 111.21(16) |
| C(11)-C(6)-C(7)     | 119.04(15) |
| C(11)-C(6)-C(1)     | 118.49(14) |
| C(7)-C(6)-C(1)      | 122.45(14) |
| C(8)-C(7)-C(6)      | 120.28(15) |
| C(8)-C(7)-H(7A)     | 119.9      |
| C(6)-C(7)-H(7A)     | 119.9      |
| C(9)-C(8)-C(7)      | 118.88(15) |
| C(9)-C(8)-H(8A)     | 120.6      |
| C(7)-C(8)-H(8A)     | 120.6      |
| C(10)-C(9)-C(8)     | 122.22(15) |
| C(10)-C(9)-N(2)     | 119.18(14) |
| C(8)-C(9)-N(2)      | 118.60(14) |
| C(11)-C(10)-C(9)    | 118.21(15) |
| C(11)-C(10)-H(10A)  | 120.9      |
| C(9)-C(10)-H(10A)   | 120.9      |
| C(10)-C(11)-C(6)    | 121.36(15) |
| C(10)-C(11)-H(11A)  | 119.3      |
| C(6)-C(11)-H(11A)   | 119.3      |
| C(5)-C(12)-H(12A)   | 109.5      |
| C(5)-C(12)-H(12B)   | 109.5      |
| H(12A)-C(12)-H(12B) | 109.5      |
| C(5)-C(12)-H(12C)   | 109.5      |
| H(12A)-C(12)-H(12C) | 109.5      |
| H(12B)-C(12)-H(12C) | 109.5      |
| C(5)-C(13)-H(13A)   | 109.5      |
| C(5)-C(13)-H(13B)   | 109.5      |
| H(13A)-C(13)-H(13B) | 109.5      |
| C(5)-C(13)-H(13C)   | 109.5      |

|                     |            |
|---------------------|------------|
| H(13A)-C(13)-H(13C) | 109.5      |
| H(13B)-C(13)-H(13C) | 109.5      |
| O(5)-C(14)-C(15)    | 125.59(15) |
| O(5)-C(14)-C(19)    | 116.06(14) |
| C(15)-C(14)-C(19)   | 118.24(14) |
| C(14)-C(15)-C(16)   | 122.68(15) |
| C(14)-C(15)-H(15A)  | 118.7      |
| C(16)-C(15)-H(15A)  | 118.7      |
| N(3)-C(16)-O(6)     | 115.45(15) |
| N(3)-C(16)-C(15)    | 128.54(16) |
| O(6)-C(16)-C(15)    | 115.98(15) |
| O(6)-C(17)-C(18)    | 105.16(15) |
| O(6)-C(17)-H(17A)   | 110.7      |
| C(18)-C(17)-H(17A)  | 110.7      |
| O(6)-C(17)-H(17B)   | 110.7      |
| C(18)-C(17)-H(17B)  | 110.7      |
| H(17A)-C(17)-H(17B) | 108.8      |
| N(3)-C(18)-C(26)    | 108.24(14) |
| N(3)-C(18)-C(25)    | 112.31(15) |
| C(26)-C(18)-C(25)   | 109.91(17) |
| N(3)-C(18)-C(17)    | 101.77(14) |
| C(26)-C(18)-C(17)   | 112.23(17) |
| C(25)-C(18)-C(17)   | 112.12(17) |
| C(24)-C(19)-C(20)   | 119.02(15) |
| C(24)-C(19)-C(14)   | 119.01(14) |
| C(20)-C(19)-C(14)   | 121.90(14) |
| C(21)-C(20)-C(19)   | 120.77(15) |
| C(21)-C(20)-H(20A)  | 119.6      |
| C(19)-C(20)-H(20A)  | 119.6      |
| C(20)-C(21)-C(22)   | 118.23(15) |
| C(20)-C(21)-H(21A)  | 120.9      |
| C(22)-C(21)-H(21A)  | 120.9      |
| C(23)-C(22)-C(21)   | 122.55(15) |
| C(23)-C(22)-N(4)    | 118.23(14) |
| C(21)-C(22)-N(4)    | 119.20(14) |
| C(22)-C(23)-C(24)   | 118.40(15) |



|                     |            |
|---------------------|------------|
| C(22)-C(23)-H(23A)  | 120.8      |
| C(24)-C(23)-H(23A)  | 120.8      |
| C(23)-C(24)-C(19)   | 120.96(15) |
| C(23)-C(24)-H(24A)  | 119.5      |
| C(19)-C(24)-H(24A)  | 119.5      |
| C(18)-C(25)-H(25A)  | 109.5      |
| C(18)-C(25)-H(25B)  | 109.5      |
| H(25A)-C(25)-H(25B) | 109.5      |
| C(18)-C(25)-H(25C)  | 109.5      |
| H(25A)-C(25)-H(25C) | 109.5      |
| H(25B)-C(25)-H(25C) | 109.5      |
| C(18)-C(26)-H(26A)  | 109.5      |
| C(18)-C(26)-H(26B)  | 109.5      |
| H(26A)-C(26)-H(26B) | 109.5      |
| C(18)-C(26)-H(26C)  | 109.5      |
| H(26A)-C(26)-H(26C) | 109.5      |
| H(26B)-C(26)-H(26C) | 109.5      |

---

Symmetry transformations used to generate equivalent atoms:

Table 4. Anisotropic displacement parameters ( $\text{\AA}^2 \times 10^3$ ) for d1833\_a. The anisotropic displacement factor exponent takes the form:  $-2\pi^2 [ h^2 a^{*2}U^{11} + \dots + 2 h k a^* b^* U^{12} ]$

|       | U <sup>11</sup> | U <sup>22</sup> | U <sup>33</sup> | U <sup>23</sup> | U <sup>13</sup> | U <sup>12</sup> |
|-------|-----------------|-----------------|-----------------|-----------------|-----------------|-----------------|
| Ni(1) | 23(1)           | 16(1)           | 13(1)           | 0(1)            | -4(1)           | -7(1)           |
| O(1)  | 26(1)           | 22(1)           | 13(1)           | 2(1)            | -6(1)           | -11(1)          |
| O(2)  | 42(1)           | 30(1)           | 21(1)           | -1(1)           | -12(1)          | -22(1)          |
| O(3)  | 59(1)           | 31(1)           | 24(1)           | -3(1)           | -16(1)          | -25(1)          |
| O(4)  | 45(1)           | 25(1)           | 19(1)           | 4(1)            | -13(1)          | -16(1)          |
| O(5)  | 26(1)           | 16(1)           | 14(1)           | 1(1)            | -4(1)           | -5(1)           |
| O(6)  | 42(1)           | 18(1)           | 29(1)           | -5(1)           | 5(1)            | -1(1)           |
| O(7)  | 82(1)           | 32(1)           | 22(1)           | -13(1)          | 6(1)            | -27(1)          |
| O(8)  | 56(1)           | 29(1)           | 20(1)           | -1(1)           | 2(1)            | -25(1)          |
| N(1)  | 21(1)           | 19(1)           | 15(1)           | -2(1)           | -6(1)           | -5(1)           |
| N(2)  | 25(1)           | 22(1)           | 15(1)           | -3(1)           | -4(1)           | -9(1)           |
| N(3)  | 20(1)           | 20(1)           | 16(1)           | -4(1)           | -1(1)           | -7(1)           |
| N(4)  | 29(1)           | 22(1)           | 18(1)           | -5(1)           | -1(1)           | -10(1)          |
| C(1)  | 19(1)           | 17(1)           | 13(1)           | -1(1)           | -2(1)           | -5(1)           |
| C(2)  | 27(1)           | 22(1)           | 15(1)           | 1(1)            | -5(1)           | -12(1)          |
| C(3)  | 21(1)           | 20(1)           | 18(1)           | -4(1)           | -4(1)           | -8(1)           |
| C(4)  | 44(1)           | 45(1)           | 20(1)           | -4(1)           | -11(1)          | -26(1)          |
| C(5)  | 27(1)           | 23(1)           | 17(1)           | -6(1)           | -7(1)           | -8(1)           |
| C(6)  | 17(1)           | 18(1)           | 14(1)           | -2(1)           | -2(1)           | -6(1)           |
| C(7)  | 24(1)           | 18(1)           | 18(1)           | -2(1)           | -5(1)           | -10(1)          |
| C(8)  | 24(1)           | 18(1)           | 16(1)           | 0(1)            | -4(1)           | -9(1)           |
| C(9)  | 18(1)           | 19(1)           | 14(1)           | -3(1)           | -3(1)           | -6(1)           |
| C(10) | 22(1)           | 17(1)           | 19(1)           | -4(1)           | -4(1)           | -8(1)           |
| C(11) | 22(1)           | 16(1)           | 16(1)           | 1(1)            | -4(1)           | -7(1)           |
| C(12) | 59(2)           | 34(1)           | 47(1)           | -9(1)           | -39(1)          | 0(1)            |
| C(13) | 41(1)           | 43(1)           | 28(1)           | -17(1)          | 4(1)            | -17(1)          |
| C(14) | 21(1)           | 19(1)           | 15(1)           | 1(1)            | -7(1)           | -8(1)           |
| C(15) | 30(1)           | 17(1)           | 18(1)           | 0(1)            | -3(1)           | -5(1)           |
| C(16) | 25(1)           | 16(1)           | 23(1)           | -5(1)           | -5(1)           | -4(1)           |
| C(17) | 47(1)           | 27(1)           | 35(1)           | -10(1)          | 14(1)           | -9(1)           |
| C(18) | 21(1)           | 24(1)           | 19(1)           | -8(1)           | -1(1)           | -4(1)           |

|       |       |       |       |        |       |        |
|-------|-------|-------|-------|--------|-------|--------|
| C(19) | 20(1) | 17(1) | 16(1) | 1(1)   | -7(1) | -5(1)  |
| C(20) | 24(1) | 18(1) | 19(1) | -4(1)  | -6(1) | -8(1)  |
| C(21) | 22(1) | 17(1) | 20(1) | -1(1)  | -5(1) | -9(1)  |
| C(22) | 20(1) | 20(1) | 13(1) | -2(1)  | -2(1) | -7(1)  |
| C(23) | 32(1) | 18(1) | 20(1) | -6(1)  | -3(1) | -9(1)  |
| C(24) | 30(1) | 16(1) | 18(1) | 0(1)   | -4(1) | -10(1) |
| C(25) | 31(1) | 63(2) | 23(1) | -20(1) | -5(1) | 2(1)   |
| C(26) | 24(1) | 42(1) | 37(1) | -14(1) | 0(1)  | -12(1) |

---

Table 5. Hydrogen coordinates ( $\times 10^4$ ) and isotropic displacement parameters ( $\text{\AA}^2 \times 10^{-3}$ ) for d1833\_a.

|        | x     | y     | z     | U(eq) |
|--------|-------|-------|-------|-------|
| H(2A)  | 1287  | -875  | 9216  | 25    |
| H(4A)  | -575  | -274  | 6703  | 39    |
| H(4B)  | 987   | -1402 | 6313  | 39    |
| H(7A)  | 2394  | -1592 | 10385 | 23    |
| H(8A)  | 2949  | -1893 | 11903 | 23    |
| H(10A) | 3733  | 1851  | 11127 | 22    |
| H(11A) | 3190  | 2139  | 9611  | 22    |
| H(12A) | 835   | 2496  | 5382  | 64    |
| H(12B) | -638  | 2095  | 6176  | 64    |
| H(12C) | 27    | 1558  | 5140  | 64    |
| H(13A) | 3399  | 686   | 5112  | 55    |
| H(13B) | 2585  | -198  | 4817  | 55    |
| H(13C) | 3451  | -845  | 5680  | 55    |
| H(15A) | 2339  | 6067  | 4933  | 28    |
| H(17A) | -1610 | 6516  | 7666  | 50    |
| H(17B) | -134  | 6522  | 7971  | 50    |
| H(20A) | 4539  | 6082  | 3757  | 23    |
| H(21A) | 5702  | 6303  | 2047  | 23    |
| H(23A) | 5408  | 2532  | 2090  | 28    |
| H(24A) | 4266  | 2315  | 3798  | 26    |
| H(25A) | 1157  | 4355  | 8852  | 61    |
| H(25B) | 442   | 3102  | 9057  | 61    |
| H(25C) | -635  | 4522  | 9382  | 61    |
| H(26A) | -1635 | 4369  | 7227  | 52    |
| H(26B) | -2274 | 4273  | 8406  | 52    |
| H(26C) | -1002 | 3010  | 7948  | 52    |

Table 6. Torsion angles [°] for d1833\_a.

---

|                       |             |
|-----------------------|-------------|
| Ni(1)-O(1)-C(1)-C(2)  | 8.9(2)      |
| Ni(1)-O(1)-C(1)-C(6)  | -170.48(10) |
| O(1)-C(1)-C(2)-C(3)   | 3.1(3)      |
| C(6)-C(1)-C(2)-C(3)   | -177.54(15) |
| C(5)-N(1)-C(3)-O(2)   | -3.2(2)     |
| Ni(1)-N(1)-C(3)-O(2)  | 178.30(11)  |
| C(5)-N(1)-C(3)-C(2)   | 176.37(17)  |
| Ni(1)-N(1)-C(3)-C(2)  | -2.1(3)     |
| C(4)-O(2)-C(3)-N(1)   | -3.8(2)     |
| C(4)-O(2)-C(3)-C(2)   | 176.55(16)  |
| C(1)-C(2)-C(3)-N(1)   | -6.7(3)     |
| C(1)-C(2)-C(3)-O(2)   | 172.91(16)  |
| C(3)-O(2)-C(4)-C(5)   | 8.8(2)      |
| C(3)-N(1)-C(5)-C(12)  | 127.93(17)  |
| Ni(1)-N(1)-C(5)-C(12) | -53.7(2)    |
| C(3)-N(1)-C(5)-C(13)  | -109.43(17) |
| Ni(1)-N(1)-C(5)-C(13) | 68.95(18)   |
| C(3)-N(1)-C(5)-C(4)   | 8.27(19)    |
| Ni(1)-N(1)-C(5)-C(4)  | -173.35(12) |
| O(2)-C(4)-C(5)-N(1)   | -10.16(19)  |
| O(2)-C(4)-C(5)-C(12)  | -127.99(17) |
| O(2)-C(4)-C(5)-C(13)  | 106.03(18)  |
| O(1)-C(1)-C(6)-C(11)  | 17.0(2)     |
| C(2)-C(1)-C(6)-C(11)  | -162.43(16) |
| O(1)-C(1)-C(6)-C(7)   | -161.44(15) |
| C(2)-C(1)-C(6)-C(7)   | 19.1(2)     |
| C(11)-C(6)-C(7)-C(8)  | -0.3(2)     |
| C(1)-C(6)-C(7)-C(8)   | 178.11(15)  |
| C(6)-C(7)-C(8)-C(9)   | 0.2(3)      |
| C(7)-C(8)-C(9)-C(10)  | 0.1(3)      |
| C(7)-C(8)-C(9)-N(2)   | -179.32(15) |
| O(3)-N(2)-C(9)-C(10)  | 2.4(2)      |
| O(4)-N(2)-C(9)-C(10)  | -178.08(15) |
| O(3)-N(2)-C(9)-C(8)   | -178.20(16) |

|                         |             |
|-------------------------|-------------|
| O(4)-N(2)-C(9)-C(8)     | 1.4(2)      |
| C(8)-C(9)-C(10)-C(11)   | -0.3(3)     |
| N(2)-C(9)-C(10)-C(11)   | 179.14(15)  |
| C(9)-C(10)-C(11)-C(6)   | 0.2(2)      |
| C(7)-C(6)-C(11)-C(10)   | 0.1(2)      |
| C(1)-C(6)-C(11)-C(10)   | -178.35(15) |
| Ni(1)-O(5)-C(14)-C(15)  | 1.3(2)      |
| Ni(1)-O(5)-C(14)-C(19)  | -174.89(10) |
| O(5)-C(14)-C(15)-C(16)  | -4.0(3)     |
| C(19)-C(14)-C(15)-C(16) | 172.02(16)  |
| C(18)-N(3)-C(16)-O(6)   | 5.3(2)      |
| Ni(1)-N(3)-C(16)-O(6)   | 176.86(12)  |
| C(18)-N(3)-C(16)-C(15)  | -172.44(18) |
| Ni(1)-N(3)-C(16)-C(15)  | -0.9(3)     |
| C(17)-O(6)-C(16)-N(3)   | 6.4(2)      |
| C(17)-O(6)-C(16)-C(15)  | -175.53(18) |
| C(14)-C(15)-C(16)-N(3)  | 3.9(3)      |
| C(14)-C(15)-C(16)-O(6)  | -173.83(17) |
| C(16)-O(6)-C(17)-C(18)  | -14.9(2)    |
| C(16)-N(3)-C(18)-C(26)  | 104.54(17)  |
| Ni(1)-N(3)-C(18)-C(26)  | -66.40(19)  |
| C(16)-N(3)-C(18)-C(25)  | -133.94(17) |
| Ni(1)-N(3)-C(18)-C(25)  | 55.1(2)     |
| C(16)-N(3)-C(18)-C(17)  | -13.86(19)  |
| Ni(1)-N(3)-C(18)-C(17)  | 175.21(14)  |
| O(6)-C(17)-C(18)-N(3)   | 17.1(2)     |
| O(6)-C(17)-C(18)-C(26)  | -98.44(19)  |
| O(6)-C(17)-C(18)-C(25)  | 137.28(18)  |
| O(5)-C(14)-C(19)-C(24)  | 33.1(2)     |
| C(15)-C(14)-C(19)-C(24) | -143.32(17) |
| O(5)-C(14)-C(19)-C(20)  | -149.76(16) |
| C(15)-C(14)-C(19)-C(20) | 33.8(2)     |
| C(24)-C(19)-C(20)-C(21) | 2.2(3)      |
| C(14)-C(19)-C(20)-C(21) | -174.96(15) |
| C(19)-C(20)-C(21)-C(22) | 0.1(3)      |
| C(20)-C(21)-C(22)-C(23) | -2.2(3)     |

|                         |             |
|-------------------------|-------------|
| C(20)-C(21)-C(22)-N(4)  | 175.96(15)  |
| O(7)-N(4)-C(22)-C(23)   | 1.0(3)      |
| O(8)-N(4)-C(22)-C(23)   | 179.68(17)  |
| O(7)-N(4)-C(22)-C(21)   | -177.23(17) |
| O(8)-N(4)-C(22)-C(21)   | 1.5(2)      |
| C(21)-C(22)-C(23)-C(24) | 1.9(3)      |
| N(4)-C(22)-C(23)-C(24)  | -176.23(16) |
| C(22)-C(23)-C(24)-C(19) | 0.4(3)      |
| C(20)-C(19)-C(24)-C(23) | -2.4(3)     |
| C(14)-C(19)-C(24)-C(23) | 174.77(16)  |

---

Symmetry transformations used to generate equivalent atoms:

### Complex 3e

Table 1. Crystal data and structure refinement for d1835\_a.

|                                   |                                                                                 |                  |
|-----------------------------------|---------------------------------------------------------------------------------|------------------|
| Identification code               | d1835_a                                                                         |                  |
| Empirical formula                 | C <sub>22</sub> H <sub>24</sub> N <sub>2</sub> Ni O <sub>4</sub> S <sub>2</sub> |                  |
| Formula weight                    | 503.26                                                                          |                  |
| Temperature                       | 150(2) K                                                                        |                  |
| Wavelength                        | 0.71073 Å                                                                       |                  |
| Crystal system                    | Monoclinic                                                                      |                  |
| Space group                       | P2 <sub>1</sub> /n                                                              |                  |
| Unit cell dimensions              | a = 9.8995(5) Å                                                                 | α = 90°.         |
|                                   | b = 14.7668(8) Å                                                                | β = 104.652(2)°. |
|                                   | c = 16.2988(9) Å                                                                | γ = 90°.         |
| Volume                            | 2305.1(2) Å <sup>3</sup>                                                        |                  |
| Z                                 | 4                                                                               |                  |
| Density (calculated)              | 1.450 Mg/m <sup>3</sup>                                                         |                  |
| Absorption coefficient            | 1.054 mm <sup>-1</sup>                                                          |                  |
| F(000)                            | 1048                                                                            |                  |
| Crystal size                      | 0.280 x 0.240 x 0.220 mm <sup>3</sup>                                           |                  |
| Theta range for data collection   | 1.889 to 27.519°.                                                               |                  |
| Index ranges                      | -12 ≤ h ≤ 12, -19 ≤ k ≤ 19, -21 ≤ l ≤ 21                                        |                  |
| Reflections collected             | 31003                                                                           |                  |
| Independent reflections           | 5293 [R(int) = 0.0282]                                                          |                  |
| Completeness to theta = 25.242°   | 100.0 %                                                                         |                  |
| Absorption correction             | Semi-empirical from equivalents                                                 |                  |
| Max. and min. transmission        | 0.7456 and 0.7172                                                               |                  |
| Refinement method                 | Full-matrix least-squares on F <sup>2</sup>                                     |                  |
| Data / restraints / parameters    | 5293 / 180 / 321                                                                |                  |
| Goodness-of-fit on F <sup>2</sup> | 1.052                                                                           |                  |
| Final R indices [I > 2σ(I)]       | R1 = 0.0264, wR2 = 0.0607                                                       |                  |
| R indices (all data)              | R1 = 0.0392, wR2 = 0.0667                                                       |                  |
| Extinction coefficient            | n/a                                                                             |                  |
| Largest diff. peak and hole       | 0.311 and -0.308 e.Å <sup>-3</sup>                                              |                  |



Table 2. Atomic coordinates ( $\times 10^4$ ) and equivalent isotropic displacement parameters ( $\text{\AA}^2 \times 10^3$ ) for d1835\_a.  $U(\text{eq})$  is defined as one third of the trace of the orthogonalized  $U^{ij}$  tensor.

|       | x        | y        | z       | $U(\text{eq})$ |
|-------|----------|----------|---------|----------------|
| Ni(1) | 6432(1)  | 4916(1)  | 7559(1) | 19(1)          |
| O(1)  | 6472(1)  | 5244(1)  | 6425(1) | 21(1)          |
| O(2)  | 4721(1)  | 7456(1)  | 7460(1) | 27(1)          |
| O(3)  | 5621(1)  | 3983(1)  | 8108(1) | 22(1)          |
| O(4)  | 9947(1)  | 4062(1)  | 9314(1) | 26(1)          |
| N(1)  | 5586(1)  | 6054(1)  | 7764(1) | 19(1)          |
| N(2)  | 8318(1)  | 4671(1)  | 8237(1) | 19(1)          |
| C(1)  | 5284(2)  | 6701(1)  | 7203(1) | 20(1)          |
| C(2)  | 5440(2)  | 6702(1)  | 6364(1) | 21(1)          |
| C(3)  | 5993(2)  | 5980(1)  | 6027(1) | 18(1)          |
| C(4)  | 4877(2)  | 7350(1)  | 8365(1) | 32(1)          |
| C(5)  | 5128(2)  | 6333(1)  | 8528(1) | 24(1)          |
| S(1)  | 7041(2)  | 5237(1)  | 4774(1) | 24(1)          |
| C(6)  | 6100(2)  | 6019(1)  | 5142(1) | 20(1)          |
| C(7)  | 5535(9)  | 6642(5)  | 4532(4) | 17(1)          |
| C(8)  | 5901(4)  | 6496(2)  | 3752(2) | 26(1)          |
| C(9)  | 6721(4)  | 5744(2)  | 3794(2) | 26(1)          |
| S(1A) | 5417(10) | 6740(6)  | 4389(4) | 26(1)          |
| C(6A) | 6100(2)  | 6019(1)  | 5142(1) | 20(1)          |
| C(7A) | 6870(20) | 5360(10) | 4854(8) | 23(2)          |
| C(8A) | 6969(14) | 5524(8)  | 4007(6) | 23(2)          |
| C(9A) | 6202(14) | 6253(8)  | 3670(6) | 25(2)          |
| C(10) | 6255(2)  | 6133(1)  | 9332(1) | 35(1)          |
| C(11) | 3769(2)  | 5844(2)  | 8529(1) | 39(1)          |
| C(12) | 6252(2)  | 3487(1)  | 8748(1) | 18(1)          |
| C(13) | 7638(2)  | 3556(1)  | 9169(1) | 21(1)          |
| C(14) | 8584(2)  | 4119(1)  | 8879(1) | 20(1)          |
| C(15) | 10725(2) | 4652(1)  | 8895(1) | 32(1)          |
| S(2)  | 3613(1)  | 2759(1)  | 8459(1) | 24(1)          |
| C(16) | 5355(2)  | 2800(1)  | 9000(1) | 18(1)          |
| C(17) | 5671(2)  | 2134(1)  | 9606(1) | 22(1)          |

|       |         |         |         |       |
|-------|---------|---------|---------|-------|
| C(18) | 4498(2) | 1593(1) | 9631(1) | 26(1) |
| C(19) | 3320(2) | 1855(1) | 9051(1) | 27(1) |
| C(20) | 9639(2) | 5100(1) | 8161(1) | 22(1) |
| C(21) | 9900(2) | 4880(2) | 7303(1) | 36(1) |
| C(22) | 9561(2) | 6117(1) | 8284(2) | 42(1) |

---

Table 3. Bond lengths [ $\text{\AA}$ ] and angles [ $^\circ$ ] for d1835\_a.

---

|             |            |
|-------------|------------|
| Ni(1)-O(1)  | 1.9214(11) |
| Ni(1)-O(3)  | 1.9253(11) |
| Ni(1)-N(1)  | 1.9437(14) |
| Ni(1)-N(2)  | 1.9479(14) |
| O(1)-C(3)   | 1.2926(19) |
| O(2)-C(1)   | 1.3596(19) |
| O(2)-C(4)   | 1.453(2)   |
| O(3)-C(12)  | 1.2978(18) |
| O(4)-C(14)  | 1.358(2)   |
| O(4)-C(15)  | 1.444(2)   |
| N(1)-C(1)   | 1.303(2)   |
| N(1)-C(5)   | 1.487(2)   |
| N(2)-C(14)  | 1.300(2)   |
| N(2)-C(20)  | 1.487(2)   |
| C(1)-C(2)   | 1.415(2)   |
| C(2)-C(3)   | 1.374(2)   |
| C(2)-H(2A)  | 0.9500     |
| C(3)-C(6A)  | 1.474(2)   |
| C(3)-C(6)   | 1.474(2)   |
| C(4)-C(5)   | 1.534(3)   |
| C(4)-H(4A)  | 0.9900     |
| C(4)-H(4B)  | 0.9900     |
| C(5)-C(10)  | 1.519(2)   |
| C(5)-C(11)  | 1.528(3)   |
| S(1)-C(6)   | 1.6863(18) |
| S(1)-C(9)   | 1.720(3)   |
| C(6)-C(7)   | 1.365(5)   |
| C(7)-C(8)   | 1.424(6)   |
| C(7)-H(7A)  | 0.9500     |
| C(8)-C(9)   | 1.367(4)   |
| C(8)-H(8A)  | 0.9500     |
| C(9)-H(9)   | 0.9500     |
| S(1A)-C(6A) | 1.637(5)   |
| S(1A)-C(9A) | 1.719(7)   |

|              |            |
|--------------|------------|
| C(6A)-C(7A)  | 1.386(8)   |
| C(7A)-C(8A)  | 1.430(8)   |
| C(7A)-H(7AA) | 0.9500     |
| C(8A)-C(9A)  | 1.352(8)   |
| C(8A)-H(8AA) | 0.9500     |
| C(9A)-H(9A)  | 0.9500     |
| C(10)-H(10A) | 0.9800     |
| C(10)-H(10B) | 0.9800     |
| C(10)-H(10C) | 0.9800     |
| C(11)-H(11A) | 0.9800     |
| C(11)-H(11B) | 0.9800     |
| C(11)-H(11C) | 0.9800     |
| C(12)-C(13)  | 1.374(2)   |
| C(12)-C(16)  | 1.474(2)   |
| C(13)-C(14)  | 1.419(2)   |
| C(13)-H(13A) | 0.9500     |
| C(15)-C(20)  | 1.541(3)   |
| C(15)-H(15A) | 0.9900     |
| C(15)-H(15B) | 0.9900     |
| S(2)-C(19)   | 1.7145(17) |
| S(2)-C(16)   | 1.7282(16) |
| C(16)-C(17)  | 1.373(2)   |
| C(17)-C(18)  | 1.418(2)   |
| C(17)-H(17A) | 0.9500     |
| C(18)-C(19)  | 1.359(2)   |
| C(18)-H(18A) | 0.9500     |
| C(19)-H(19)  | 0.9500     |
| C(20)-C(22)  | 1.520(2)   |
| C(20)-C(21)  | 1.520(2)   |
| C(21)-H(21A) | 0.9800     |
| C(21)-H(21B) | 0.9800     |
| C(21)-H(21C) | 0.9800     |
| C(22)-H(22A) | 0.9800     |
| C(22)-H(22B) | 0.9800     |
| C(22)-H(22C) | 0.9800     |

|                  |            |
|------------------|------------|
| O(1)-Ni(1)-O(3)  | 137.71(5)  |
| O(1)-Ni(1)-N(1)  | 93.58(5)   |
| O(3)-Ni(1)-N(1)  | 106.88(5)  |
| O(1)-Ni(1)-N(2)  | 110.04(5)  |
| O(3)-Ni(1)-N(2)  | 93.18(5)   |
| N(1)-Ni(1)-N(2)  | 117.17(6)  |
| C(3)-O(1)-Ni(1)  | 126.87(10) |
| C(1)-O(2)-C(4)   | 106.11(12) |
| C(12)-O(3)-Ni(1) | 127.21(11) |
| C(14)-O(4)-C(15) | 107.16(13) |
| C(1)-N(1)-C(5)   | 108.73(13) |
| C(1)-N(1)-Ni(1)  | 123.01(11) |
| C(5)-N(1)-Ni(1)  | 128.23(11) |
| C(14)-N(2)-C(20) | 109.34(14) |
| C(14)-N(2)-Ni(1) | 122.92(11) |
| C(20)-N(2)-Ni(1) | 127.62(11) |
| N(1)-C(1)-O(2)   | 115.07(14) |
| N(1)-C(1)-C(2)   | 128.15(15) |
| O(2)-C(1)-C(2)   | 116.76(14) |
| C(3)-C(2)-C(1)   | 122.47(15) |
| C(3)-C(2)-H(2A)  | 118.8      |
| C(1)-C(2)-H(2A)  | 118.8      |
| O(1)-C(3)-C(2)   | 125.78(14) |
| O(1)-C(3)-C(6A)  | 114.58(14) |
| C(2)-C(3)-C(6A)  | 119.63(14) |
| O(1)-C(3)-C(6)   | 114.58(14) |
| C(2)-C(3)-C(6)   | 119.63(14) |
| O(2)-C(4)-C(5)   | 104.67(13) |
| O(2)-C(4)-H(4A)  | 110.8      |
| C(5)-C(4)-H(4A)  | 110.8      |
| O(2)-C(4)-H(4B)  | 110.8      |
| C(5)-C(4)-H(4B)  | 110.8      |
| H(4A)-C(4)-H(4B) | 108.9      |
| N(1)-C(5)-C(10)  | 110.83(14) |
| N(1)-C(5)-C(11)  | 108.96(14) |
| C(10)-C(5)-C(11) | 111.25(16) |

|                     |            |
|---------------------|------------|
| N(1)-C(5)-C(4)      | 101.28(13) |
| C(10)-C(5)-C(4)     | 113.03(16) |
| C(11)-C(5)-C(4)     | 111.03(16) |
| C(6)-S(1)-C(9)      | 92.49(13)  |
| C(7)-C(6)-C(3)      | 128.4(3)   |
| C(7)-C(6)-S(1)      | 111.4(3)   |
| C(3)-C(6)-S(1)      | 120.23(12) |
| C(6)-C(7)-C(8)      | 113.5(4)   |
| C(6)-C(7)-H(7A)     | 123.3      |
| C(8)-C(7)-H(7A)     | 123.3      |
| C(9)-C(8)-C(7)      | 111.1(3)   |
| C(9)-C(8)-H(8A)     | 124.4      |
| C(7)-C(8)-H(8A)     | 124.4      |
| C(8)-C(9)-S(1)      | 111.6(2)   |
| C(8)-C(9)-H(9)      | 124.2      |
| S(1)-C(9)-H(9)      | 124.2      |
| C(6A)-S(1A)-C(9A)   | 93.8(4)    |
| C(7A)-C(6A)-C(3)    | 119.0(5)   |
| C(7A)-C(6A)-S(1A)   | 111.1(5)   |
| C(3)-C(6A)-S(1A)    | 129.9(3)   |
| C(6A)-C(7A)-C(8A)   | 112.8(7)   |
| C(6A)-C(7A)-H(7AA)  | 123.6      |
| C(8A)-C(7A)-H(7AA)  | 123.6      |
| C(9A)-C(8A)-C(7A)   | 110.8(8)   |
| C(9A)-C(8A)-H(8AA)  | 124.6      |
| C(7A)-C(8A)-H(8AA)  | 124.6      |
| C(8A)-C(9A)-S(1A)   | 111.2(7)   |
| C(8A)-C(9A)-H(9A)   | 124.4      |
| S(1A)-C(9A)-H(9A)   | 124.4      |
| C(5)-C(10)-H(10A)   | 109.5      |
| C(5)-C(10)-H(10B)   | 109.5      |
| H(10A)-C(10)-H(10B) | 109.5      |
| C(5)-C(10)-H(10C)   | 109.5      |
| H(10A)-C(10)-H(10C) | 109.5      |
| H(10B)-C(10)-H(10C) | 109.5      |
| C(5)-C(11)-H(11A)   | 109.5      |

|                     |            |
|---------------------|------------|
| C(5)-C(11)-H(11B)   | 109.5      |
| H(11A)-C(11)-H(11B) | 109.5      |
| C(5)-C(11)-H(11C)   | 109.5      |
| H(11A)-C(11)-H(11C) | 109.5      |
| H(11B)-C(11)-H(11C) | 109.5      |
| O(3)-C(12)-C(13)    | 125.19(14) |
| O(3)-C(12)-C(16)    | 114.26(14) |
| C(13)-C(12)-C(16)   | 120.55(14) |
| C(12)-C(13)-C(14)   | 122.48(15) |
| C(12)-C(13)-H(13A)  | 118.8      |
| C(14)-C(13)-H(13A)  | 118.8      |
| N(2)-C(14)-O(4)     | 115.51(14) |
| N(2)-C(14)-C(13)    | 128.20(15) |
| O(4)-C(14)-C(13)    | 116.27(14) |
| O(4)-C(15)-C(20)    | 105.95(14) |
| O(4)-C(15)-H(15A)   | 110.5      |
| C(20)-C(15)-H(15A)  | 110.5      |
| O(4)-C(15)-H(15B)   | 110.5      |
| C(20)-C(15)-H(15B)  | 110.5      |
| H(15A)-C(15)-H(15B) | 108.7      |
| C(19)-S(2)-C(16)    | 91.67(8)   |
| C(17)-C(16)-C(12)   | 130.55(15) |
| C(17)-C(16)-S(2)    | 110.99(12) |
| C(12)-C(16)-S(2)    | 118.43(12) |
| C(16)-C(17)-C(18)   | 112.65(15) |
| C(16)-C(17)-H(17A)  | 123.7      |
| C(18)-C(17)-H(17A)  | 123.7      |
| C(19)-C(18)-C(17)   | 112.64(15) |
| C(19)-C(18)-H(18A)  | 123.7      |
| C(17)-C(18)-H(18A)  | 123.7      |
| C(18)-C(19)-S(2)    | 112.04(13) |
| C(18)-C(19)-H(19)   | 124.0      |
| S(2)-C(19)-H(19)    | 124.0      |
| N(2)-C(20)-C(22)    | 109.61(14) |
| N(2)-C(20)-C(21)    | 110.11(14) |
| C(22)-C(20)-C(21)   | 111.00(16) |

|                     |            |
|---------------------|------------|
| N(2)-C(20)-C(15)    | 102.00(13) |
| C(22)-C(20)-C(15)   | 111.74(16) |
| C(21)-C(20)-C(15)   | 112.01(15) |
| C(20)-C(21)-H(21A)  | 109.5      |
| C(20)-C(21)-H(21B)  | 109.5      |
| H(21A)-C(21)-H(21B) | 109.5      |
| C(20)-C(21)-H(21C)  | 109.5      |
| H(21A)-C(21)-H(21C) | 109.5      |
| H(21B)-C(21)-H(21C) | 109.5      |
| C(20)-C(22)-H(22A)  | 109.5      |
| C(20)-C(22)-H(22B)  | 109.5      |
| H(22A)-C(22)-H(22B) | 109.5      |
| C(20)-C(22)-H(22C)  | 109.5      |
| H(22A)-C(22)-H(22C) | 109.5      |
| H(22B)-C(22)-H(22C) | 109.5      |

---

Symmetry transformations used to generate equivalent atoms:



Table 4. Anisotropic displacement parameters ( $\text{\AA}^2 \times 10^3$ ) for d1835\_a. The anisotropic displacement factor exponent takes the form:  $-2\pi^2 [ h^2 a^{*2} U^{11} + \dots + 2 h k a^* b^* U^{12} ]$

|       | U <sup>11</sup> | U <sup>22</sup> | U <sup>33</sup> | U <sup>23</sup> | U <sup>13</sup> | U <sup>12</sup> |
|-------|-----------------|-----------------|-----------------|-----------------|-----------------|-----------------|
| Ni(1) | 20(1)           | 19(1)           | 18(1)           | 5(1)            | 6(1)            | 1(1)            |
| O(1)  | 24(1)           | 20(1)           | 18(1)           | 2(1)            | 7(1)            | 2(1)            |
| O(2)  | 36(1)           | 25(1)           | 22(1)           | 1(1)            | 10(1)           | 10(1)           |
| O(3)  | 21(1)           | 24(1)           | 19(1)           | 7(1)            | 2(1)            | -2(1)           |
| O(4)  | 16(1)           | 30(1)           | 31(1)           | 8(1)            | 2(1)            | -2(1)           |
| N(1)  | 19(1)           | 23(1)           | 16(1)           | 1(1)            | 6(1)            | 1(1)            |
| N(2)  | 18(1)           | 18(1)           | 23(1)           | 2(1)            | 7(1)            | -2(1)           |
| C(1)  | 17(1)           | 21(1)           | 21(1)           | -1(1)           | 5(1)            | 0(1)            |
| C(2)  | 23(1)           | 20(1)           | 19(1)           | 5(1)            | 6(1)            | 1(1)            |
| C(3)  | 16(1)           | 20(1)           | 17(1)           | 1(1)            | 4(1)            | -4(1)           |
| C(4)  | 42(1)           | 35(1)           | 21(1)           | -2(1)           | 10(1)           | 10(1)           |
| C(5)  | 24(1)           | 30(1)           | 18(1)           | 0(1)            | 9(1)            | 5(1)            |
| S(1)  | 28(1)           | 20(1)           | 25(1)           | -5(1)           | 13(1)           | 0(1)            |
| C(6)  | 22(1)           | 23(1)           | 17(1)           | -2(1)           | 6(1)            | -7(1)           |
| C(7)  | 24(2)           | 18(2)           | 8(2)            | 5(1)            | 2(2)            | -1(1)           |
| C(8)  | 39(2)           | 22(2)           | 17(1)           | -2(1)           | 6(1)            | -8(1)           |
| C(9)  | 39(2)           | 28(2)           | 15(1)           | -2(1)           | 11(1)           | -9(1)           |
| S(1A) | 35(2)           | 21(2)           | 15(2)           | 11(1)           | -5(2)           | -2(1)           |
| C(6A) | 22(1)           | 23(1)           | 17(1)           | -2(1)           | 6(1)            | -7(1)           |
| C(7A) | 33(4)           | 25(4)           | 13(4)           | 7(3)            | 8(3)            | -8(3)           |
| C(8A) | 33(4)           | 21(4)           | 16(4)           | 2(3)            | 10(3)           | -3(3)           |
| C(9A) | 34(4)           | 29(4)           | 13(3)           | -1(4)           | 9(3)            | -7(4)           |
| C(10) | 38(1)           | 48(1)           | 19(1)           | -1(1)           | 6(1)            | 13(1)           |
| C(11) | 32(1)           | 50(1)           | 40(1)           | 0(1)            | 21(1)           | -2(1)           |
| C(12) | 22(1)           | 16(1)           | 17(1)           | 0(1)            | 7(1)            | 0(1)            |
| C(13) | 20(1)           | 20(1)           | 21(1)           | 6(1)            | 4(1)            | 1(1)            |
| C(14) | 18(1)           | 19(1)           | 21(1)           | -1(1)           | 4(1)            | 2(1)            |
| C(15) | 20(1)           | 40(1)           | 38(1)           | 9(1)            | 9(1)            | -5(1)           |
| S(2)  | 21(1)           | 27(1)           | 22(1)           | 4(1)            | 3(1)            | -5(1)           |
| C(16) | 19(1)           | 19(1)           | 18(1)           | -2(1)           | 6(1)            | 0(1)            |
| C(17) | 20(1)           | 21(1)           | 25(1)           | 4(1)            | 7(1)            | 1(1)            |

|       |       |       |       |       |       |       |
|-------|-------|-------|-------|-------|-------|-------|
| C(18) | 29(1) | 21(1) | 31(1) | 6(1)  | 11(1) | -2(1) |
| C(19) | 26(1) | 26(1) | 31(1) | 1(1)  | 10(1) | -8(1) |
| C(20) | 18(1) | 20(1) | 30(1) | 1(1)  | 10(1) | -3(1) |
| C(21) | 29(1) | 51(1) | 32(1) | -1(1) | 16(1) | -2(1) |
| C(22) | 31(1) | 22(1) | 74(2) | -6(1) | 19(1) | -5(1) |

---

Table 5. Hydrogen coordinates ( $\times 10^4$ ) and isotropic displacement parameters ( $\text{\AA}^2 \times 10^{-3}$ ) for d1835\_a.

|        | x     | y    | z     | U(eq) |
|--------|-------|------|-------|-------|
| H(2A)  | 5152  | 7221 | 6020  | 25    |
| H(4A)  | 4022  | 7548 | 8524  | 39    |
| H(4B)  | 5679  | 7707 | 8693  | 39    |
| H(7A)  | 4955  | 7125 | 4620  | 20    |
| H(8A)  | 5613  | 6872 | 3266  | 32    |
| H(9)   | 7071  | 5529 | 3339  | 32    |
| H(7AA) | 7276  | 4854 | 5184  | 28    |
| H(8AA) | 7505  | 5167 | 3720  | 27    |
| H(9A)  | 6110  | 6469 | 3110  | 30    |
| H(10A) | 7115  | 6450 | 9312  | 53    |
| H(10B) | 6430  | 5480 | 9377  | 53    |
| H(10C) | 5945  | 6341 | 9826  | 53    |
| H(11A) | 3925  | 5188 | 8543  | 58    |
| H(11B) | 3052  | 6003 | 8015  | 58    |
| H(11C) | 3457  | 6026 | 9030  | 58    |
| H(13A) | 7976  | 3215 | 9674  | 25    |
| H(15A) | 11409 | 4300 | 8675  | 39    |
| H(15B) | 11233 | 5116 | 9294  | 39    |
| H(17A) | 6576  | 2045 | 9968  | 26    |
| H(18A) | 4533  | 1102 | 10012 | 32    |
| H(19)  | 2437  | 1570 | 8981  | 32    |
| H(21A) | 9137  | 5125 | 6852  | 54    |
| H(21B) | 9947  | 4222 | 7239  | 54    |
| H(21C) | 10785 | 5152 | 7265  | 54    |
| H(22A) | 8802  | 6371 | 7836  | 62    |
| H(22B) | 10448 | 6396 | 8258  | 62    |
| H(22C) | 9384  | 6241 | 8838  | 62    |

Table 6. Torsion angles [°] for d1835\_a.

---

|                       |             |
|-----------------------|-------------|
| C(5)-N(1)-C(1)-O(2)   | 3.3(2)      |
| Ni(1)-N(1)-C(1)-O(2)  | -178.81(11) |
| C(5)-N(1)-C(1)-C(2)   | -175.09(16) |
| Ni(1)-N(1)-C(1)-C(2)  | 2.8(2)      |
| C(4)-O(2)-C(1)-N(1)   | 10.3(2)     |
| C(4)-O(2)-C(1)-C(2)   | -171.16(15) |
| N(1)-C(1)-C(2)-C(3)   | -1.6(3)     |
| O(2)-C(1)-C(2)-C(3)   | -179.88(15) |
| Ni(1)-O(1)-C(3)-C(2)  | 4.6(2)      |
| Ni(1)-O(1)-C(3)-C(6A) | -176.68(10) |
| Ni(1)-O(1)-C(3)-C(6)  | -176.68(10) |
| C(1)-C(2)-C(3)-O(1)   | -2.5(3)     |
| C(1)-C(2)-C(3)-C(6A)  | 178.81(15)  |
| C(1)-C(2)-C(3)-C(6)   | 178.81(15)  |
| C(1)-O(2)-C(4)-C(5)   | -18.61(18)  |
| C(1)-N(1)-C(5)-C(10)  | -134.54(16) |
| Ni(1)-N(1)-C(5)-C(10) | 47.7(2)     |
| C(1)-N(1)-C(5)-C(11)  | 102.73(17)  |
| Ni(1)-N(1)-C(5)-C(11) | -75.05(18)  |
| C(1)-N(1)-C(5)-C(4)   | -14.36(18)  |
| Ni(1)-N(1)-C(5)-C(4)  | 167.87(12)  |
| O(2)-C(4)-C(5)-N(1)   | 19.60(18)   |
| O(2)-C(4)-C(5)-C(10)  | 138.21(15)  |
| O(2)-C(4)-C(5)-C(11)  | -95.97(17)  |
| O(1)-C(3)-C(6)-C(7)   | 170.8(6)    |
| C(2)-C(3)-C(6)-C(7)   | -10.4(6)    |
| O(1)-C(3)-C(6)-S(1)   | -10.4(2)    |
| C(2)-C(3)-C(6)-S(1)   | 168.45(14)  |
| C(9)-S(1)-C(6)-C(7)   | 1.1(5)      |
| C(9)-S(1)-C(6)-C(3)   | -177.93(17) |
| C(3)-C(6)-C(7)-C(8)   | 177.4(4)    |
| S(1)-C(6)-C(7)-C(8)   | -1.5(9)     |
| C(6)-C(7)-C(8)-C(9)   | 1.2(9)      |
| C(7)-C(8)-C(9)-S(1)   | -0.4(6)     |

|                         |             |
|-------------------------|-------------|
| C(6)-S(1)-C(9)-C(8)     | -0.4(3)     |
| O(1)-C(3)-C(6A)-C(7A)   | -9.5(11)    |
| C(2)-C(3)-C(6A)-C(7A)   | 169.3(11)   |
| O(1)-C(3)-C(6A)-S(1A)   | 169.5(5)    |
| C(2)-C(3)-C(6A)-S(1A)   | -11.7(6)    |
| C(9A)-S(1A)-C(6A)-C(7A) | -3.8(13)    |
| C(9A)-S(1A)-C(6A)-C(3)  | 177.1(5)    |
| C(3)-C(6A)-C(7A)-C(8A)  | -175.4(11)  |
| S(1A)-C(6A)-C(7A)-C(8A) | 5(2)        |
| C(6A)-C(7A)-C(8A)-C(9A) | -4(2)       |
| C(7A)-C(8A)-C(9A)-S(1A) | 1.6(19)     |
| C(6A)-S(1A)-C(9A)-C(8A) | 1.2(13)     |
| Ni(1)-O(3)-C(12)-C(13)  | 1.7(2)      |
| Ni(1)-O(3)-C(12)-C(16)  | -177.34(10) |
| O(3)-C(12)-C(13)-C(14)  | -7.9(3)     |
| C(16)-C(12)-C(13)-C(14) | 171.15(15)  |
| C(20)-N(2)-C(14)-O(4)   | -0.06(19)   |
| Ni(1)-N(2)-C(14)-O(4)   | -176.40(10) |
| C(20)-N(2)-C(14)-C(13)  | -178.51(16) |
| Ni(1)-N(2)-C(14)-C(13)  | 5.2(2)      |
| C(15)-O(4)-C(14)-N(2)   | -1.2(2)     |
| C(15)-O(4)-C(14)-C(13)  | 177.47(15)  |
| C(12)-C(13)-C(14)-N(2)  | 4.1(3)      |
| C(12)-C(13)-C(14)-O(4)  | -174.35(15) |
| C(14)-O(4)-C(15)-C(20)  | 1.81(19)    |
| O(3)-C(12)-C(16)-C(17)  | 176.04(16)  |
| C(13)-C(12)-C(16)-C(17) | -3.1(3)     |
| O(3)-C(12)-C(16)-S(2)   | -2.07(19)   |
| C(13)-C(12)-C(16)-S(2)  | 178.80(12)  |
| C(19)-S(2)-C(16)-C(17)  | 0.26(13)    |
| C(19)-S(2)-C(16)-C(12)  | 178.72(13)  |
| C(12)-C(16)-C(17)-C(18) | -178.36(16) |
| S(2)-C(16)-C(17)-C(18)  | -0.14(18)   |
| C(16)-C(17)-C(18)-C(19) | -0.1(2)     |
| C(17)-C(18)-C(19)-S(2)  | 0.3(2)      |
| C(16)-S(2)-C(19)-C(18)  | -0.32(15)   |

|                        |             |
|------------------------|-------------|
| C(14)-N(2)-C(20)-C(22) | -117.38(17) |
| Ni(1)-N(2)-C(20)-C(22) | 58.73(19)   |
| C(14)-N(2)-C(20)-C(21) | 120.24(16)  |
| Ni(1)-N(2)-C(20)-C(21) | -63.65(18)  |
| C(14)-N(2)-C(20)-C(15) | 1.16(18)    |
| Ni(1)-N(2)-C(20)-C(15) | 177.27(12)  |
| O(4)-C(15)-C(20)-N(2)  | -1.77(18)   |
| O(4)-C(15)-C(20)-C(22) | 115.24(17)  |
| O(4)-C(15)-C(20)-C(21) | -119.49(16) |

---

Symmetry transformations used to generate equivalent atoms:

### Complex 3f.

Table 1. Crystal data and structure refinement for d18101\_a.

|                                   |                                                                  |                  |
|-----------------------------------|------------------------------------------------------------------|------------------|
| Identification code               | d18101_a                                                         |                  |
| Empirical formula                 | C <sub>28</sub> H <sub>26</sub> N <sub>4</sub> Ni O <sub>4</sub> |                  |
| Formula weight                    | 541.24                                                           |                  |
| Temperature                       | 150(2) K                                                         |                  |
| Wavelength                        | 0.71073 Å                                                        |                  |
| Crystal system                    | Triclinic                                                        |                  |
| Space group                       | P-1                                                              |                  |
| Unit cell dimensions              | a = 6.9179(6) Å                                                  | α = 103.140(3)°. |
|                                   | b = 9.6038(10) Å                                                 | β = 94.606(3)°.  |
|                                   | c = 20.210(2) Å                                                  | γ = 98.490(3)°.  |
| Volume                            | 1284.2(2) Å <sup>3</sup>                                         |                  |
| Z                                 | 2                                                                |                  |
| Density (calculated)              | 1.400 Mg/m <sup>3</sup>                                          |                  |
| Absorption coefficient            | 0.797 mm <sup>-1</sup>                                           |                  |
| F(000)                            | 564                                                              |                  |
| Crystal size                      | 0.250 x 0.080 x 0.050 mm <sup>3</sup>                            |                  |
| Theta range for data collection   | 2.084 to 27.673°.                                                |                  |
| Index ranges                      | -9 ≤ h ≤ 9, -12 ≤ k ≤ 12, -26 ≤ l ≤ 26                           |                  |
| Reflections collected             | 52010                                                            |                  |
| Independent reflections           | 5966 [R(int) = 0.0449]                                           |                  |
| Completeness to theta = 25.242°   | 100.0 %                                                          |                  |
| Absorption correction             | Semi-empirical from equivalents                                  |                  |
| Max. and min. transmission        | 0.7456 and 0.7090                                                |                  |
| Refinement method                 | Full-matrix least-squares on F <sup>2</sup>                      |                  |
| Data / restraints / parameters    | 5966 / 0 / 338                                                   |                  |
| Goodness-of-fit on F <sup>2</sup> | 1.024                                                            |                  |
| Final R indices [I > 2σ(I)]       | R1 = 0.0305, wR2 = 0.0640                                        |                  |
| R indices (all data)              | R1 = 0.0448, wR2 = 0.0692                                        |                  |
| Extinction coefficient            | n/a                                                              |                  |
| Largest diff. peak and hole       | 0.361 and -0.294 e.Å <sup>-3</sup>                               |                  |

Table 2. Atomic coordinates ( $\times 10^4$ ) and equivalent isotropic displacement parameters ( $\text{\AA}^2 \times 10^3$ ) for d18101\_a.  $U(\text{eq})$  is defined as one third of the trace of the orthogonalized  $U^{ij}$  tensor.

|       | x        | y       | z       | $U(\text{eq})$ |
|-------|----------|---------|---------|----------------|
| Ni(1) | 2238(1)  | 3694(1) | 2491(1) | 17(1)          |
| O(1)  | 3714(2)  | 3389(1) | 3281(1) | 21(1)          |
| O(2)  | -941(2)  | 5443(1) | 4004(1) | 26(1)          |
| O(3)  | 2711(2)  | 4588(1) | 1743(1) | 20(1)          |
| O(4)  | 665(2)   | 124(1)  | 877(1)  | 27(1)          |
| N(1)  | 487(2)   | 4690(1) | 3057(1) | 17(1)          |
| N(2)  | 9216(3)  | 614(2)  | 5901(1) | 45(1)          |
| N(3)  | 1378(2)  | 1800(2) | 1877(1) | 18(1)          |
| N(4)  | 3811(2)  | 8964(2) | -878(1) | 33(1)          |
| C(1)  | 3260(2)  | 3560(2) | 3903(1) | 18(1)          |
| C(2)  | 1758(2)  | 4245(2) | 4141(1) | 21(1)          |
| C(3)  | 490(2)   | 4782(2) | 3710(1) | 19(1)          |
| C(4)  | -2085(3) | 5866(2) | 3471(1) | 22(1)          |
| C(5)  | -1226(2) | 5268(2) | 2803(1) | 19(1)          |
| C(6)  | 4532(2)  | 2938(2) | 4358(1) | 19(1)          |
| C(7)  | 4058(3)  | 2776(2) | 4997(1) | 28(1)          |
| C(8)  | 5252(3)  | 2166(2) | 5392(1) | 32(1)          |
| C(9)  | 6935(3)  | 1708(2) | 5156(1) | 26(1)          |
| C(10) | 7421(3)  | 1845(2) | 4517(1) | 31(1)          |
| C(11) | 6209(3)  | 2451(2) | 4125(1) | 27(1)          |
| C(12) | 8201(3)  | 1088(2) | 5573(1) | 32(1)          |
| C(13) | -2636(3) | 4021(2) | 2315(1) | 24(1)          |
| C(14) | -556(3)  | 6468(2) | 2449(1) | 30(1)          |
| C(15) | 2356(2)  | 3994(2) | 1089(1) | 18(1)          |
| C(16) | 1677(3)  | 2549(2) | 807(1)  | 22(1)          |
| C(17) | 1262(2)  | 1536(2) | 1214(1) | 20(1)          |
| C(18) | -13(3)   | -623(2) | 1387(1) | 26(1)          |
| C(19) | 897(3)   | 399(2)  | 2077(1) | 22(1)          |
| C(20) | 2725(2)  | 5045(2) | 644(1)  | 17(1)          |
| C(21) | 3469(3)  | 6498(2) | 955(1)  | 24(1)          |
| C(22) | 3777(3)  | 7520(2) | 571(1)  | 26(1)          |



|       |         |         |         |       |
|-------|---------|---------|---------|-------|
| C(23) | 3343(2) | 7089(2) | -138(1) | 21(1) |
| C(24) | 2625(3) | 5639(2) | -455(1) | 25(1) |
| C(25) | 2319(3) | 4633(2) | -66(1)  | 22(1) |
| C(26) | 3618(3) | 8147(2) | -547(1) | 25(1) |
| C(27) | -553(3) | 540(2)  | 2609(1) | 29(1) |
| C(28) | 2818(3) | -8(2)   | 2344(1) | 28(1) |

---

Table 3. Bond lengths [Å] and angles [°] for d18101\_a.

---

|             |            |
|-------------|------------|
| Ni(1)-O(1)  | 1.9276(11) |
| Ni(1)-O(3)  | 1.9282(11) |
| Ni(1)-N(3)  | 1.9338(14) |
| Ni(1)-N(1)  | 1.9381(13) |
| O(1)-C(1)   | 1.2998(19) |
| O(2)-C(3)   | 1.3580(19) |
| O(2)-C(4)   | 1.452(2)   |
| O(3)-C(15)  | 1.3020(19) |
| O(4)-C(17)  | 1.358(2)   |
| O(4)-C(18)  | 1.453(2)   |
| N(1)-C(3)   | 1.303(2)   |
| N(1)-C(5)   | 1.484(2)   |
| N(2)-C(12)  | 1.138(2)   |
| N(3)-C(17)  | 1.300(2)   |
| N(3)-C(19)  | 1.490(2)   |
| N(4)-C(26)  | 1.143(2)   |
| C(1)-C(2)   | 1.372(2)   |
| C(1)-C(6)   | 1.500(2)   |
| C(2)-C(3)   | 1.417(2)   |
| C(2)-H(2A)  | 0.9500     |
| C(4)-C(5)   | 1.544(2)   |
| C(4)-H(4A)  | 0.9900     |
| C(4)-H(4B)  | 0.9900     |
| C(5)-C(13)  | 1.524(2)   |
| C(5)-C(14)  | 1.524(2)   |
| C(6)-C(11)  | 1.391(2)   |
| C(6)-C(7)   | 1.395(2)   |
| C(7)-C(8)   | 1.383(2)   |
| C(7)-H(7A)  | 0.9500     |
| C(8)-C(9)   | 1.387(3)   |
| C(8)-H(8A)  | 0.9500     |
| C(9)-C(10)  | 1.389(3)   |
| C(9)-C(12)  | 1.448(2)   |
| C(10)-C(11) | 1.385(2)   |

|                 |           |
|-----------------|-----------|
| C(10)-H(10A)    | 0.9500    |
| C(11)-H(11A)    | 0.9500    |
| C(13)-H(13A)    | 0.9800    |
| C(13)-H(13B)    | 0.9800    |
| C(13)-H(13C)    | 0.9800    |
| C(14)-H(14A)    | 0.9800    |
| C(14)-H(14B)    | 0.9800    |
| C(14)-H(14C)    | 0.9800    |
| C(15)-C(16)     | 1.370(2)  |
| C(15)-C(20)     | 1.505(2)  |
| C(16)-C(17)     | 1.422(2)  |
| C(16)-H(16A)    | 0.9500    |
| C(18)-C(19)     | 1.535(2)  |
| C(18)-H(18A)    | 0.9900    |
| C(18)-H(18B)    | 0.9900    |
| C(19)-C(27)     | 1.526(2)  |
| C(19)-C(28)     | 1.532(2)  |
| C(20)-C(25)     | 1.394(2)  |
| C(20)-C(21)     | 1.394(2)  |
| C(21)-C(22)     | 1.385(2)  |
| C(21)-H(21A)    | 0.9500    |
| C(22)-C(23)     | 1.393(2)  |
| C(22)-H(22A)    | 0.9500    |
| C(23)-C(24)     | 1.391(2)  |
| C(23)-C(26)     | 1.449(2)  |
| C(24)-C(25)     | 1.380(2)  |
| C(24)-H(24A)    | 0.9500    |
| C(25)-H(25A)    | 0.9500    |
| C(27)-H(27A)    | 0.9800    |
| C(27)-H(27B)    | 0.9800    |
| C(27)-H(27C)    | 0.9800    |
| C(28)-H(28A)    | 0.9800    |
| C(28)-H(28B)    | 0.9800    |
| C(28)-H(28C)    | 0.9800    |
| O(1)-Ni(1)-O(3) | 138.36(5) |

|                  |            |
|------------------|------------|
| O(1)-Ni(1)-N(3)  | 106.42(5)  |
| O(3)-Ni(1)-N(3)  | 92.11(5)   |
| O(1)-Ni(1)-N(1)  | 91.51(5)   |
| O(3)-Ni(1)-N(1)  | 109.82(5)  |
| N(3)-Ni(1)-N(1)  | 122.31(6)  |
| C(1)-O(1)-Ni(1)  | 128.54(10) |
| C(3)-O(2)-C(4)   | 107.37(12) |
| C(15)-O(3)-Ni(1) | 128.22(11) |
| C(17)-O(4)-C(18) | 105.98(13) |
| C(3)-N(1)-C(5)   | 109.54(13) |
| C(3)-N(1)-Ni(1)  | 124.34(11) |
| C(5)-N(1)-Ni(1)  | 125.57(10) |
| C(17)-N(3)-C(19) | 108.75(14) |
| C(17)-N(3)-Ni(1) | 124.74(12) |
| C(19)-N(3)-Ni(1) | 126.34(10) |
| O(1)-C(1)-C(2)   | 124.30(15) |
| O(1)-C(1)-C(6)   | 114.30(14) |
| C(2)-C(1)-C(6)   | 121.40(14) |
| C(1)-C(2)-C(3)   | 122.01(15) |
| C(1)-C(2)-H(2A)  | 119.0      |
| C(3)-C(2)-H(2A)  | 119.0      |
| N(1)-C(3)-O(2)   | 115.18(14) |
| N(1)-C(3)-C(2)   | 128.11(15) |
| O(2)-C(3)-C(2)   | 116.69(14) |
| O(2)-C(4)-C(5)   | 105.45(13) |
| O(2)-C(4)-H(4A)  | 110.7      |
| C(5)-C(4)-H(4A)  | 110.7      |
| O(2)-C(4)-H(4B)  | 110.7      |
| C(5)-C(4)-H(4B)  | 110.7      |
| H(4A)-C(4)-H(4B) | 108.8      |
| N(1)-C(5)-C(13)  | 108.50(13) |
| N(1)-C(5)-C(14)  | 110.64(14) |
| C(13)-C(5)-C(14) | 111.05(14) |
| N(1)-C(5)-C(4)   | 102.09(12) |
| C(13)-C(5)-C(4)  | 112.68(14) |
| C(14)-C(5)-C(4)  | 111.50(14) |

|                     |            |
|---------------------|------------|
| C(11)-C(6)-C(7)     | 118.45(15) |
| C(11)-C(6)-C(1)     | 119.00(15) |
| C(7)-C(6)-C(1)      | 122.51(15) |
| C(8)-C(7)-C(6)      | 120.49(17) |
| C(8)-C(7)-H(7A)     | 119.8      |
| C(6)-C(7)-H(7A)     | 119.8      |
| C(7)-C(8)-C(9)      | 120.23(17) |
| C(7)-C(8)-H(8A)     | 119.9      |
| C(9)-C(8)-H(8A)     | 119.9      |
| C(8)-C(9)-C(10)     | 120.15(16) |
| C(8)-C(9)-C(12)     | 120.29(17) |
| C(10)-C(9)-C(12)    | 119.56(18) |
| C(11)-C(10)-C(9)    | 119.11(17) |
| C(11)-C(10)-H(10A)  | 120.4      |
| C(9)-C(10)-H(10A)   | 120.4      |
| C(10)-C(11)-C(6)    | 121.54(17) |
| C(10)-C(11)-H(11A)  | 119.2      |
| C(6)-C(11)-H(11A)   | 119.2      |
| N(2)-C(12)-C(9)     | 179.1(2)   |
| C(5)-C(13)-H(13A)   | 109.5      |
| C(5)-C(13)-H(13B)   | 109.5      |
| H(13A)-C(13)-H(13B) | 109.5      |
| C(5)-C(13)-H(13C)   | 109.5      |
| H(13A)-C(13)-H(13C) | 109.5      |
| H(13B)-C(13)-H(13C) | 109.5      |
| C(5)-C(14)-H(14A)   | 109.5      |
| C(5)-C(14)-H(14B)   | 109.5      |
| H(14A)-C(14)-H(14B) | 109.5      |
| C(5)-C(14)-H(14C)   | 109.5      |
| H(14A)-C(14)-H(14C) | 109.5      |
| H(14B)-C(14)-H(14C) | 109.5      |
| O(3)-C(15)-C(16)    | 124.83(15) |
| O(3)-C(15)-C(20)    | 114.22(14) |
| C(16)-C(15)-C(20)   | 120.95(14) |
| C(15)-C(16)-C(17)   | 122.33(15) |
| C(15)-C(16)-H(16A)  | 118.8      |

|                     |            |
|---------------------|------------|
| C(17)-C(16)-H(16A)  | 118.8      |
| N(3)-C(17)-O(4)     | 115.35(15) |
| N(3)-C(17)-C(16)    | 127.60(15) |
| O(4)-C(17)-C(16)    | 117.06(14) |
| O(4)-C(18)-C(19)    | 104.82(13) |
| O(4)-C(18)-H(18A)   | 110.8      |
| C(19)-C(18)-H(18A)  | 110.8      |
| O(4)-C(18)-H(18B)   | 110.8      |
| C(19)-C(18)-H(18B)  | 110.8      |
| H(18A)-C(18)-H(18B) | 108.9      |
| N(3)-C(19)-C(27)    | 109.86(13) |
| N(3)-C(19)-C(28)    | 108.39(14) |
| C(27)-C(19)-C(28)   | 112.17(15) |
| N(3)-C(19)-C(18)    | 101.08(13) |
| C(27)-C(19)-C(18)   | 112.82(15) |
| C(28)-C(19)-C(18)   | 111.88(14) |
| C(25)-C(20)-C(21)   | 118.36(15) |
| C(25)-C(20)-C(15)   | 122.79(15) |
| C(21)-C(20)-C(15)   | 118.84(14) |
| C(22)-C(21)-C(20)   | 121.25(16) |
| C(22)-C(21)-H(21A)  | 119.4      |
| C(20)-C(21)-H(21A)  | 119.4      |
| C(21)-C(22)-C(23)   | 119.50(16) |
| C(21)-C(22)-H(22A)  | 120.2      |
| C(23)-C(22)-H(22A)  | 120.2      |
| C(24)-C(23)-C(22)   | 119.83(15) |
| C(24)-C(23)-C(26)   | 119.83(16) |
| C(22)-C(23)-C(26)   | 120.34(16) |
| C(25)-C(24)-C(23)   | 120.08(16) |
| C(25)-C(24)-H(24A)  | 120.0      |
| C(23)-C(24)-H(24A)  | 120.0      |
| C(24)-C(25)-C(20)   | 120.97(16) |
| C(24)-C(25)-H(25A)  | 119.5      |
| C(20)-C(25)-H(25A)  | 119.5      |
| N(4)-C(26)-C(23)    | 178.8(2)   |
| C(19)-C(27)-H(27A)  | 109.5      |

|                     |       |
|---------------------|-------|
| C(19)-C(27)-H(27B)  | 109.5 |
| H(27A)-C(27)-H(27B) | 109.5 |
| C(19)-C(27)-H(27C)  | 109.5 |
| H(27A)-C(27)-H(27C) | 109.5 |
| H(27B)-C(27)-H(27C) | 109.5 |
| C(19)-C(28)-H(28A)  | 109.5 |
| C(19)-C(28)-H(28B)  | 109.5 |
| H(28A)-C(28)-H(28B) | 109.5 |
| C(19)-C(28)-H(28C)  | 109.5 |
| H(28A)-C(28)-H(28C) | 109.5 |
| H(28B)-C(28)-H(28C) | 109.5 |

---

Symmetry transformations used to generate equivalent atoms:

Table 4. Anisotropic displacement parameters ( $\text{\AA}^2 \times 10^3$ ) for d18101\_a. The anisotropic displacement factor exponent takes the form:  $-2\pi^2 [ h^2 a^{*2} U^{11} + \dots + 2 h k a^* b^* U^{12} ]$

|       | U <sup>11</sup> | U <sup>22</sup> | U <sup>33</sup> | U <sup>23</sup> | U <sup>13</sup> | U <sup>12</sup> |
|-------|-----------------|-----------------|-----------------|-----------------|-----------------|-----------------|
| Ni(1) | 20(1)           | 21(1)           | 13(1)           | 6(1)            | 3(1)            | 5(1)            |
| O(1)  | 20(1)           | 29(1)           | 15(1)           | 9(1)            | 3(1)            | 6(1)            |
| O(2)  | 32(1)           | 35(1)           | 18(1)           | 9(1)            | 9(1)            | 18(1)           |
| O(3)  | 23(1)           | 22(1)           | 14(1)           | 6(1)            | 2(1)            | 3(1)            |
| O(4)  | 42(1)           | 18(1)           | 19(1)           | 4(1)            | 3(1)            | 3(1)            |
| N(1)  | 18(1)           | 18(1)           | 16(1)           | 6(1)            | 1(1)            | 4(1)            |
| N(2)  | 57(1)           | 45(1)           | 36(1)           | 12(1)           | -10(1)          | 20(1)           |
| N(3)  | 22(1)           | 19(1)           | 17(1)           | 7(1)            | 4(1)            | 5(1)            |
| N(4)  | 40(1)           | 31(1)           | 32(1)           | 16(1)           | 1(1)            | 2(1)            |
| C(1)  | 18(1)           | 18(1)           | 15(1)           | 5(1)            | 0(1)            | -2(1)           |
| C(2)  | 27(1)           | 24(1)           | 13(1)           | 5(1)            | 3(1)            | 6(1)            |
| C(3)  | 20(1)           | 17(1)           | 18(1)           | 3(1)            | 4(1)            | 2(1)            |
| C(4)  | 22(1)           | 25(1)           | 21(1)           | 6(1)            | 3(1)            | 8(1)            |
| C(5)  | 20(1)           | 19(1)           | 19(1)           | 7(1)            | 5(1)            | 8(1)            |
| C(6)  | 21(1)           | 18(1)           | 17(1)           | 5(1)            | -1(1)           | 0(1)            |
| C(7)  | 34(1)           | 36(1)           | 18(1)           | 8(1)            | 5(1)            | 15(1)           |
| C(8)  | 47(1)           | 39(1)           | 16(1)           | 10(1)           | 2(1)            | 17(1)           |
| C(9)  | 31(1)           | 21(1)           | 24(1)           | 6(1)            | -7(1)           | 4(1)            |
| C(10) | 26(1)           | 38(1)           | 32(1)           | 16(1)           | 3(1)            | 10(1)           |
| C(11) | 25(1)           | 38(1)           | 23(1)           | 16(1)           | 5(1)            | 7(1)            |
| C(12) | 38(1)           | 30(1)           | 26(1)           | 7(1)            | -6(1)           | 7(1)            |
| C(13) | 22(1)           | 30(1)           | 20(1)           | 6(1)            | 1(1)            | 6(1)            |
| C(14) | 37(1)           | 26(1)           | 34(1)           | 17(1)           | 13(1)           | 13(1)           |
| C(15) | 15(1)           | 24(1)           | 16(1)           | 8(1)            | 4(1)            | 7(1)            |
| C(16) | 29(1)           | 24(1)           | 14(1)           | 7(1)            | 3(1)            | 6(1)            |
| C(17) | 21(1)           | 19(1)           | 20(1)           | 4(1)            | 2(1)            | 5(1)            |
| C(18) | 32(1)           | 19(1)           | 26(1)           | 9(1)            | 4(1)            | 3(1)            |
| C(19) | 29(1)           | 16(1)           | 22(1)           | 8(1)            | 5(1)            | 5(1)            |
| C(20) | 15(1)           | 22(1)           | 17(1)           | 7(1)            | 4(1)            | 6(1)            |
| C(21) | 34(1)           | 24(1)           | 16(1)           | 5(1)            | 5(1)            | 7(1)            |
| C(22) | 35(1)           | 19(1)           | 25(1)           | 6(1)            | 7(1)            | 5(1)            |



|       |       |       |       |       |       |      |
|-------|-------|-------|-------|-------|-------|------|
| C(23) | 21(1) | 24(1) | 23(1) | 13(1) | 6(1)  | 7(1) |
| C(24) | 27(1) | 31(1) | 17(1) | 10(1) | 1(1)  | 2(1) |
| C(25) | 26(1) | 22(1) | 18(1) | 5(1)  | 1(1)  | 1(1) |
| C(26) | 26(1) | 26(1) | 24(1) | 9(1)  | 3(1)  | 4(1) |
| C(27) | 37(1) | 22(1) | 31(1) | 12(1) | 14(1) | 5(1) |
| C(28) | 35(1) | 24(1) | 29(1) | 10(1) | 1(1)  | 9(1) |

---

Table 5. Hydrogen coordinates ( $\times 10^4$ ) and isotropic displacement parameters ( $\text{\AA}^2 \times 10^{-3}$ ) for d18101\_a.

|        | x     | y     | z    | U(eq) |
|--------|-------|-------|------|-------|
| H(2A)  | 1561  | 4364  | 4609 | 25    |
| H(4A)  | -1955 | 6936  | 3566 | 27    |
| H(4B)  | -3494 | 5443  | 3438 | 27    |
| H(7A)  | 2907  | 3086  | 5162 | 34    |
| H(8A)  | 4919  | 2061  | 5827 | 39    |
| H(10A) | 8568  | 1527  | 4352 | 37    |
| H(11A) | 6532  | 2536  | 3686 | 33    |
| H(13A) | -1939 | 3556  | 1945 | 36    |
| H(13B) | -3737 | 4396  | 2121 | 36    |
| H(13C) | -3140 | 3308  | 2565 | 36    |
| H(14A) | 116   | 6076  | 2057 | 44    |
| H(14B) | 349   | 7254  | 2772 | 44    |
| H(14C) | -1704 | 6843  | 2289 | 44    |
| H(16A) | 1476  | 2212  | 323  | 26    |
| H(18A) | 442   | -1569 | 1327 | 31    |
| H(18B) | -1467 | -790  | 1355 | 31    |
| H(21A) | 3771  | 6793  | 1438 | 29    |
| H(22A) | 4281  | 8506  | 790  | 31    |
| H(24A) | 2346  | 5341  | -939 | 30    |
| H(25A) | 1824  | 3646  | -287 | 27    |
| H(27A) | 55    | 1277  | 3022 | 43    |
| H(27B) | -904  | -395  | 2725 | 43    |
| H(27C) | -1742 | 828   | 2422 | 43    |
| H(28A) | 3414  | 717   | 2762 | 43    |
| H(28B) | 3730  | -39   | 1996 | 43    |
| H(28C) | 2540  | -964  | 2445 | 43    |

Table 6. Torsion angles [°] for d18101\_a.

---

|                        |             |
|------------------------|-------------|
| Ni(1)-O(1)-C(1)-C(2)   | -12.0(2)    |
| Ni(1)-O(1)-C(1)-C(6)   | 168.05(10)  |
| O(1)-C(1)-C(2)-C(3)    | 2.8(3)      |
| C(6)-C(1)-C(2)-C(3)    | -177.19(15) |
| C(5)-N(1)-C(3)-O(2)    | -3.9(2)     |
| Ni(1)-N(1)-C(3)-O(2)   | -175.78(10) |
| C(5)-N(1)-C(3)-C(2)    | 174.19(16)  |
| Ni(1)-N(1)-C(3)-C(2)   | 2.3(3)      |
| C(4)-O(2)-C(3)-N(1)    | -0.13(19)   |
| C(4)-O(2)-C(3)-C(2)    | -178.45(14) |
| C(1)-C(2)-C(3)-N(1)    | 2.1(3)      |
| C(1)-C(2)-C(3)-O(2)    | -179.86(15) |
| C(3)-O(2)-C(4)-C(5)    | 3.86(17)    |
| C(3)-N(1)-C(5)-C(13)   | -113.34(15) |
| Ni(1)-N(1)-C(5)-C(13)  | 58.42(17)   |
| C(3)-N(1)-C(5)-C(14)   | 124.60(15)  |
| Ni(1)-N(1)-C(5)-C(14)  | -63.65(17)  |
| C(3)-N(1)-C(5)-C(4)    | 5.84(17)    |
| Ni(1)-N(1)-C(5)-C(4)   | 177.59(11)  |
| O(2)-C(4)-C(5)-N(1)    | -5.69(16)   |
| O(2)-C(4)-C(5)-C(13)   | 110.49(15)  |
| O(2)-C(4)-C(5)-C(14)   | -123.84(15) |
| O(1)-C(1)-C(6)-C(11)   | 9.5(2)      |
| C(2)-C(1)-C(6)-C(11)   | -170.44(16) |
| O(1)-C(1)-C(6)-C(7)    | -167.93(16) |
| C(2)-C(1)-C(6)-C(7)    | 12.1(3)     |
| C(11)-C(6)-C(7)-C(8)   | 1.1(3)      |
| C(1)-C(6)-C(7)-C(8)    | 178.53(17)  |
| C(6)-C(7)-C(8)-C(9)    | -0.1(3)     |
| C(7)-C(8)-C(9)-C(10)   | -0.7(3)     |
| C(7)-C(8)-C(9)-C(12)   | 179.14(18)  |
| C(8)-C(9)-C(10)-C(11)  | 0.4(3)      |
| C(12)-C(9)-C(10)-C(11) | -179.43(18) |
| C(9)-C(10)-C(11)-C(6)  | 0.7(3)      |

|                         |             |
|-------------------------|-------------|
| C(7)-C(6)-C(11)-C(10)   | -1.4(3)     |
| C(1)-C(6)-C(11)-C(10)   | -178.92(17) |
| Ni(1)-O(3)-C(15)-C(16)  | -4.7(2)     |
| Ni(1)-O(3)-C(15)-C(20)  | 174.33(10)  |
| O(3)-C(15)-C(16)-C(17)  | 0.8(3)      |
| C(20)-C(15)-C(16)-C(17) | -178.20(15) |
| C(19)-N(3)-C(17)-O(4)   | 2.9(2)      |
| Ni(1)-N(3)-C(17)-O(4)   | 178.54(10)  |
| C(19)-N(3)-C(17)-C(16)  | -177.30(16) |
| Ni(1)-N(3)-C(17)-C(16)  | -1.7(3)     |
| C(18)-O(4)-C(17)-N(3)   | 10.38(19)   |
| C(18)-O(4)-C(17)-C(16)  | -169.41(15) |
| C(15)-C(16)-C(17)-N(3)  | 2.6(3)      |
| C(15)-C(16)-C(17)-O(4)  | -177.61(15) |
| C(17)-O(4)-C(18)-C(19)  | -18.45(17)  |
| C(17)-N(3)-C(19)-C(27)  | -133.33(15) |
| Ni(1)-N(3)-C(19)-C(27)  | 51.15(18)   |
| C(17)-N(3)-C(19)-C(28)  | 103.79(16)  |
| Ni(1)-N(3)-C(19)-C(28)  | -71.72(17)  |
| C(17)-N(3)-C(19)-C(18)  | -13.94(17)  |
| Ni(1)-N(3)-C(19)-C(18)  | 170.55(11)  |
| O(4)-C(18)-C(19)-N(3)   | 19.24(16)   |
| O(4)-C(18)-C(19)-C(27)  | 136.50(14)  |
| O(4)-C(18)-C(19)-C(28)  | -95.91(16)  |
| O(3)-C(15)-C(20)-C(25)  | -176.03(15) |
| C(16)-C(15)-C(20)-C(25) | 3.0(2)      |
| O(3)-C(15)-C(20)-C(21)  | 2.7(2)      |
| C(16)-C(15)-C(20)-C(21) | -178.23(16) |
| C(25)-C(20)-C(21)-C(22) | 0.9(3)      |
| C(15)-C(20)-C(21)-C(22) | -177.92(15) |
| C(20)-C(21)-C(22)-C(23) | -0.2(3)     |
| C(21)-C(22)-C(23)-C(24) | -0.7(3)     |
| C(21)-C(22)-C(23)-C(26) | 178.78(16)  |
| C(22)-C(23)-C(24)-C(25) | 0.9(3)      |
| C(26)-C(23)-C(24)-C(25) | -178.57(16) |
| C(23)-C(24)-C(25)-C(20) | -0.2(3)     |

|                         |            |
|-------------------------|------------|
| C(21)-C(20)-C(25)-C(24) | -0.6(3)    |
| C(15)-C(20)-C(25)-C(24) | 178.09(15) |

---

Symmetry transformations used to generate equivalent atoms:

### Complex 3g.

Table 1. Crystal data and structure refinement for d18100.

|                                   |                                                                                 |          |
|-----------------------------------|---------------------------------------------------------------------------------|----------|
| Identification code               | d18100                                                                          |          |
| Empirical formula                 | C <sub>16</sub> H <sub>18</sub> F <sub>6</sub> N <sub>2</sub> Ni O <sub>4</sub> |          |
| Formula weight                    | 475.03                                                                          |          |
| Temperature                       | 150(2) K                                                                        |          |
| Wavelength                        | 0.71073 Å                                                                       |          |
| Crystal system                    | Orthorhombic                                                                    |          |
| Space group                       | Pbca                                                                            |          |
| Unit cell dimensions              | a = 11.1193(4) Å                                                                | α = 90°. |
|                                   | b = 18.3316(8) Å                                                                | β = 90°. |
|                                   | c = 19.0410(8) Å                                                                | γ = 90°. |
| Volume                            | 3881.2(3) Å <sup>3</sup>                                                        |          |
| Z                                 | 8                                                                               |          |
| Density (calculated)              | 1.626 Mg/m <sup>3</sup>                                                         |          |
| Absorption coefficient            | 1.081 mm <sup>-1</sup>                                                          |          |
| F(000)                            | 1936                                                                            |          |
| Crystal size                      | 0.300 x 0.150 x 0.050 mm <sup>3</sup>                                           |          |
| Theta range for data collection   | 2.139 to 27.524°.                                                               |          |
| Index ranges                      | -12 ≤ h ≤ 14, -22 ≤ k ≤ 23, -24 ≤ l ≤ 23                                        |          |
| Reflections collected             | 26354                                                                           |          |
| Independent reflections           | 4427 [R(int) = 0.0721]                                                          |          |
| Completeness to theta = 25.242°   | 99.5 %                                                                          |          |
| Absorption correction             | Semi-empirical from equivalents                                                 |          |
| Max. and min. transmission        | 0.7456 and 0.6878                                                               |          |
| Refinement method                 | Full-matrix least-squares on F <sup>2</sup>                                     |          |
| Data / restraints / parameters    | 4427 / 51 / 294                                                                 |          |
| Goodness-of-fit on F <sup>2</sup> | 0.993                                                                           |          |
| Final R indices [I > 2σ(I)]       | R1 = 0.0386, wR2 = 0.0679                                                       |          |
| R indices (all data)              | R1 = 0.0735, wR2 = 0.0789                                                       |          |
| Extinction coefficient            | n/a                                                                             |          |
| Largest diff. peak and hole       | 0.331 and -0.279 e.Å <sup>-3</sup>                                              |          |

Table 2. Atomic coordinates ( $\times 10^4$ ) and equivalent isotropic displacement parameters ( $\text{\AA}^2 \times 10^3$ ) for d18100.  $U(\text{eq})$  is defined as one third of the trace of the orthogonalized  $U^{ij}$  tensor.

|       | x        | y        | z        | $U(\text{eq})$ |
|-------|----------|----------|----------|----------------|
| Ni(1) | 3836(1)  | 1647(1)  | 3739(1)  | 21(1)          |
| F(1)  | 1433(1)  | 3392(1)  | 2715(1)  | 62(1)          |
| F(2)  | 2749(2)  | 3755(1)  | 1982(1)  | 46(1)          |
| F(3)  | 2985(2)  | 3985(1)  | 3068(1)  | 56(1)          |
| F(4)  | 1856(16) | -57(12)  | 5584(4)  | 67(3)          |
| F(5)  | 2786(12) | -663(5)  | 4825(14) | 73(3)          |
| F(6)  | 1230(9)  | -33(11)  | 4551(9)  | 49(3)          |
| F(4A) | 1117(9)  | 50(13)   | 4702(11) | 61(4)          |
| F(5A) | 2170(20) | -243(12) | 5582(4)  | 77(4)          |
| F(6A) | 2652(15) | -593(6)  | 4547(10) | 64(3)          |
| O(1)  | 3127(2)  | 2516(1)  | 3360(1)  | 28(1)          |
| O(2)  | 5009(2)  | 1493(1)  | 1706(1)  | 44(1)          |
| O(3)  | 2909(1)  | 867(1)   | 4150(1)  | 26(1)          |
| O(4)  | 5154(2)  | 1710(1)  | 5750(1)  | 33(1)          |
| N(1)  | 4551(2)  | 1383(1)  | 2844(1)  | 22(1)          |
| N(2)  | 4672(2)  | 1844(1)  | 4613(1)  | 22(1)          |
| C(1)  | 3266(2)  | 2761(1)  | 2733(1)  | 24(1)          |
| C(2)  | 3882(2)  | 2458(1)  | 2196(1)  | 28(1)          |
| C(3)  | 4473(2)  | 1773(1)  | 2276(1)  | 26(1)          |
| C(4)  | 5378(3)  | 754(2)   | 1888(2)  | 51(1)          |
| C(5)  | 5296(2)  | 727(1)   | 2687(1)  | 27(1)          |
| C(6)  | 2611(2)  | 3477(2)  | 2619(2)  | 33(1)          |
| C(7)  | 6502(2)  | 818(2)   | 3044(2)  | 53(1)          |
| C(8)  | 4675(3)  | 35(2)    | 2936(2)  | 44(1)          |
| C(9)  | 3013(2)  | 626(1)   | 4779(1)  | 24(1)          |
| C(10) | 3733(2)  | 877(1)   | 5301(1)  | 28(1)          |
| C(11) | 4519(2)  | 1482(1)  | 5193(1)  | 24(1)          |
| C(12) | 5993(2)  | 2253(2)  | 5485(1)  | 32(1)          |
| C(13) | 5487(2)  | 2473(1)  | 4771(2)  | 27(1)          |
| C(14) | 2228(2)  | -38(2)   | 4922(1)  | 35(1)          |
| C(15) | 6445(3)  | 2539(2)  | 4210(2)  | 44(1)          |

C(16)

4728(3)

3167(2)

4819(2)

42(1)

---



Table 3. Bond lengths [ $\text{\AA}$ ] and angles [ $^\circ$ ] for d18100.

---

|             |            |
|-------------|------------|
| Ni(1)-O(1)  | 1.9185(17) |
| Ni(1)-O(3)  | 1.9284(16) |
| Ni(1)-N(2)  | 1.940(2)   |
| Ni(1)-N(1)  | 1.941(2)   |
| F(1)-C(6)   | 1.331(3)   |
| F(2)-C(6)   | 1.326(3)   |
| F(3)-C(6)   | 1.330(3)   |
| F(4)-C(14)  | 1.327(6)   |
| F(5)-C(14)  | 1.316(6)   |
| F(6)-C(14)  | 1.315(6)   |
| F(4A)-C(14) | 1.314(6)   |
| F(5A)-C(14) | 1.314(6)   |
| F(6A)-C(14) | 1.329(6)   |
| O(1)-C(1)   | 1.285(3)   |
| O(2)-C(3)   | 1.341(3)   |
| O(2)-C(4)   | 1.457(3)   |
| O(3)-C(9)   | 1.281(3)   |
| O(4)-C(11)  | 1.339(3)   |
| O(4)-C(12)  | 1.455(3)   |
| N(1)-C(3)   | 1.301(3)   |
| N(1)-C(5)   | 1.491(3)   |
| N(2)-C(11)  | 1.300(3)   |
| N(2)-C(13)  | 1.497(3)   |
| C(1)-C(2)   | 1.351(3)   |
| C(1)-C(6)   | 1.516(3)   |
| C(2)-C(3)   | 1.424(3)   |
| C(2)-H(2A)  | 0.9500     |
| C(4)-C(5)   | 1.525(4)   |
| C(4)-H(4A)  | 0.9900     |
| C(4)-H(4B)  | 0.9900     |
| C(5)-C(7)   | 1.513(4)   |
| C(5)-C(8)   | 1.520(4)   |
| C(7)-H(7A)  | 0.9800     |
| C(7)-H(7B)  | 0.9800     |

|                  |            |
|------------------|------------|
| C(7)-H(7C)       | 0.9800     |
| C(8)-H(8A)       | 0.9800     |
| C(8)-H(8B)       | 0.9800     |
| C(8)-H(8C)       | 0.9800     |
| C(9)-C(10)       | 1.357(3)   |
| C(9)-C(14)       | 1.522(4)   |
| C(10)-C(11)      | 1.427(4)   |
| C(10)-H(10A)     | 0.9500     |
| C(12)-C(13)      | 1.527(4)   |
| C(12)-H(12A)     | 0.9900     |
| C(12)-H(12B)     | 0.9900     |
| C(13)-C(15)      | 1.513(4)   |
| C(13)-C(16)      | 1.530(4)   |
| C(15)-H(15A)     | 0.9800     |
| C(15)-H(15B)     | 0.9800     |
| C(15)-H(15C)     | 0.9800     |
| C(16)-H(16A)     | 0.9800     |
| C(16)-H(16B)     | 0.9800     |
| C(16)-H(16C)     | 0.9800     |
| O(1)-Ni(1)-O(3)  | 123.24(7)  |
| O(1)-Ni(1)-N(2)  | 111.40(8)  |
| O(3)-Ni(1)-N(2)  | 92.62(8)   |
| O(1)-Ni(1)-N(1)  | 92.58(8)   |
| O(3)-Ni(1)-N(1)  | 113.00(8)  |
| N(2)-Ni(1)-N(1)  | 127.11(8)  |
| C(1)-O(1)-Ni(1)  | 126.23(16) |
| C(3)-O(2)-C(4)   | 106.7(2)   |
| C(9)-O(3)-Ni(1)  | 125.91(16) |
| C(11)-O(4)-C(12) | 106.14(19) |
| C(3)-N(1)-C(5)   | 108.3(2)   |
| C(3)-N(1)-Ni(1)  | 124.48(17) |
| C(5)-N(1)-Ni(1)  | 127.24(17) |
| C(11)-N(2)-C(13) | 107.6(2)   |
| C(11)-N(2)-Ni(1) | 124.88(17) |
| C(13)-N(2)-Ni(1) | 127.24(17) |

|                  |          |
|------------------|----------|
| O(1)-C(1)-C(2)   | 128.3(2) |
| O(1)-C(1)-C(6)   | 112.2(2) |
| C(2)-C(1)-C(6)   | 119.5(2) |
| C(1)-C(2)-C(3)   | 121.1(2) |
| C(1)-C(2)-H(2A)  | 119.5    |
| C(3)-C(2)-H(2A)  | 119.5    |
| N(1)-C(3)-O(2)   | 115.7(2) |
| N(1)-C(3)-C(2)   | 127.2(2) |
| O(2)-C(3)-C(2)   | 117.1(2) |
| O(2)-C(4)-C(5)   | 104.6(2) |
| O(2)-C(4)-H(4A)  | 110.8    |
| C(5)-C(4)-H(4A)  | 110.8    |
| O(2)-C(4)-H(4B)  | 110.8    |
| C(5)-C(4)-H(4B)  | 110.8    |
| H(4A)-C(4)-H(4B) | 108.9    |
| N(1)-C(5)-C(7)   | 108.3(2) |
| N(1)-C(5)-C(8)   | 111.0(2) |
| C(7)-C(5)-C(8)   | 110.8(3) |
| N(1)-C(5)-C(4)   | 102.0(2) |
| C(7)-C(5)-C(4)   | 113.0(3) |
| C(8)-C(5)-C(4)   | 111.4(3) |
| F(2)-C(6)-F(3)   | 106.4(2) |
| F(2)-C(6)-F(1)   | 106.5(2) |
| F(3)-C(6)-F(1)   | 107.6(2) |
| F(2)-C(6)-C(1)   | 114.1(2) |
| F(3)-C(6)-C(1)   | 111.4(2) |
| F(1)-C(6)-C(1)   | 110.6(2) |
| C(5)-C(7)-H(7A)  | 109.5    |
| C(5)-C(7)-H(7B)  | 109.5    |
| H(7A)-C(7)-H(7B) | 109.5    |
| C(5)-C(7)-H(7C)  | 109.5    |
| H(7A)-C(7)-H(7C) | 109.5    |
| H(7B)-C(7)-H(7C) | 109.5    |
| C(5)-C(8)-H(8A)  | 109.5    |
| C(5)-C(8)-H(8B)  | 109.5    |
| H(8A)-C(8)-H(8B) | 109.5    |

|                     |            |
|---------------------|------------|
| C(5)-C(8)-H(8C)     | 109.5      |
| H(8A)-C(8)-H(8C)    | 109.5      |
| H(8B)-C(8)-H(8C)    | 109.5      |
| O(3)-C(9)-C(10)     | 128.4(2)   |
| O(3)-C(9)-C(14)     | 113.0(2)   |
| C(10)-C(9)-C(14)    | 118.6(2)   |
| C(9)-C(10)-C(11)    | 121.3(2)   |
| C(9)-C(10)-H(10A)   | 119.4      |
| C(11)-C(10)-H(10A)  | 119.4      |
| N(2)-C(11)-O(4)     | 116.4(2)   |
| N(2)-C(11)-C(10)    | 126.8(2)   |
| O(4)-C(11)-C(10)    | 116.8(2)   |
| O(4)-C(12)-C(13)    | 104.61(19) |
| O(4)-C(12)-H(12A)   | 110.8      |
| C(13)-C(12)-H(12A)  | 110.8      |
| O(4)-C(12)-H(12B)   | 110.8      |
| C(13)-C(12)-H(12B)  | 110.8      |
| H(12A)-C(12)-H(12B) | 108.9      |
| N(2)-C(13)-C(15)    | 110.3(2)   |
| N(2)-C(13)-C(12)    | 101.5(2)   |
| C(15)-C(13)-C(12)   | 113.0(2)   |
| N(2)-C(13)-C(16)    | 108.6(2)   |
| C(15)-C(13)-C(16)   | 111.4(3)   |
| C(12)-C(13)-C(16)   | 111.7(2)   |
| F(5A)-C(14)-F(4A)   | 107.2(11)  |
| F(6)-C(14)-F(5)     | 109.2(11)  |
| F(6)-C(14)-F(4)     | 104.3(10)  |
| F(5)-C(14)-F(4)     | 104.9(8)   |
| F(5A)-C(14)-F(6A)   | 108.1(8)   |
| F(4A)-C(14)-F(6A)   | 104.9(11)  |
| F(5A)-C(14)-C(9)    | 115.2(9)   |
| F(4A)-C(14)-C(9)    | 112.6(10)  |
| F(6)-C(14)-C(9)     | 112.5(9)   |
| F(5)-C(14)-C(9)     | 113.6(6)   |
| F(4)-C(14)-C(9)     | 111.7(9)   |
| F(6A)-C(14)-C(9)    | 108.2(7)   |

|                     |       |
|---------------------|-------|
| C(13)-C(15)-H(15A)  | 109.5 |
| C(13)-C(15)-H(15B)  | 109.5 |
| H(15A)-C(15)-H(15B) | 109.5 |
| C(13)-C(15)-H(15C)  | 109.5 |
| H(15A)-C(15)-H(15C) | 109.5 |
| H(15B)-C(15)-H(15C) | 109.5 |
| C(13)-C(16)-H(16A)  | 109.5 |
| C(13)-C(16)-H(16B)  | 109.5 |
| H(16A)-C(16)-H(16B) | 109.5 |
| C(13)-C(16)-H(16C)  | 109.5 |
| H(16A)-C(16)-H(16C) | 109.5 |
| H(16B)-C(16)-H(16C) | 109.5 |

---

Symmetry transformations used to generate equivalent atoms:

Table 4. Anisotropic displacement parameters ( $\text{\AA}^2 \times 10^3$ ) for d18100. The anisotropic displacement factor exponent takes the form:  $-2\pi^2 [ h^2 a^{*2} U^{11} + \dots + 2 h k a^* b^* U^{12} ]$

|       | U <sup>11</sup> | U <sup>22</sup> | U <sup>33</sup> | U <sup>23</sup> | U <sup>13</sup> | U <sup>12</sup> |
|-------|-----------------|-----------------|-----------------|-----------------|-----------------|-----------------|
| Ni(1) | 24(1)           | 24(1)           | 15(1)           | 3(1)            | 1(1)            | -2(1)           |
| F(1)  | 33(1)           | 52(1)           | 103(2)          | 30(1)           | 10(1)           | 15(1)           |
| F(2)  | 65(1)           | 36(1)           | 38(1)           | 16(1)           | -4(1)           | 4(1)            |
| F(3)  | 87(1)           | 31(1)           | 51(1)           | -9(1)           | -12(1)          | 13(1)           |
| F(4)  | 68(6)           | 89(9)           | 43(4)           | 23(3)           | 12(3)           | -35(5)          |
| F(5)  | 49(3)           | 22(2)           | 149(9)          | 22(4)           | 22(6)           | 6(2)            |
| F(6)  | 45(4)           | 57(6)           | 46(4)           | 25(4)           | -14(4)          | -30(4)          |
| F(4A) | 29(3)           | 58(5)           | 96(9)           | 25(6)           | 7(4)            | -5(3)           |
| F(5A) | 105(10)         | 77(7)           | 51(4)           | 45(4)           | -21(4)          | -45(6)          |
| F(6A) | 80(5)           | 21(3)           | 91(7)           | -3(3)           | 24(5)           | -11(3)          |
| O(1)  | 31(1)           | 30(1)           | 24(1)           | 5(1)            | 6(1)            | 7(1)            |
| O(2)  | 68(1)           | 37(1)           | 26(1)           | 1(1)            | 19(1)           | 9(1)            |
| O(3)  | 26(1)           | 30(1)           | 23(1)           | 6(1)            | -2(1)           | -7(1)           |
| O(4)  | 35(1)           | 44(1)           | 21(1)           | -6(1)           | -7(1)           | 0(1)            |
| N(1)  | 23(1)           | 22(1)           | 22(1)           | 0(1)            | 2(1)            | 0(1)            |
| N(2)  | 21(1)           | 21(1)           | 24(1)           | -2(1)           | -1(1)           | 0(1)            |
| C(1)  | 23(1)           | 26(1)           | 24(1)           | 6(1)            | -2(1)           | -5(1)           |
| C(2)  | 36(1)           | 28(1)           | 19(1)           | 6(1)            | 2(1)            | -2(1)           |
| C(3)  | 30(1)           | 29(2)           | 21(1)           | -1(1)           | 6(1)            | -4(1)           |
| C(4)  | 72(2)           | 39(2)           | 42(2)           | -3(2)           | 17(2)           | 11(2)           |
| C(5)  | 24(1)           | 24(1)           | 32(2)           | -3(1)           | 6(1)            | 2(1)            |
| C(6)  | 36(2)           | 28(2)           | 35(2)           | 6(1)            | 0(1)            | 1(1)            |
| C(7)  | 26(2)           | 50(2)           | 83(3)           | -23(2)          | -6(2)           | 10(1)           |
| C(8)  | 37(2)           | 29(2)           | 64(2)           | 1(2)            | 9(2)            | -1(1)           |
| C(9)  | 24(1)           | 21(1)           | 27(2)           | 5(1)            | 6(1)            | 4(1)            |
| C(10) | 35(1)           | 31(1)           | 17(1)           | 6(1)            | 0(1)            | 4(1)            |
| C(11) | 26(1)           | 27(1)           | 18(1)           | -4(1)           | -1(1)           | 8(1)            |
| C(12) | 29(1)           | 35(2)           | 34(2)           | -11(1)          | -7(1)           | 0(1)            |
| C(13) | 25(1)           | 27(1)           | 29(2)           | -8(1)           | -2(1)           | -5(1)           |
| C(14) | 36(2)           | 31(2)           | 38(2)           | 9(1)            | 4(1)            | -2(1)           |
| C(15) | 39(2)           | 55(2)           | 39(2)           | -11(2)          | 7(1)            | -24(1)          |

C(16)    44(2)    27(2)    54(2)    -7(1)    -9(2)    -1(1)

---

Table 5. Hydrogen coordinates ( $\times 10^4$ ) and isotropic displacement parameters ( $\text{\AA}^2 \times 10^{-3}$ ) for d18100.

|        | x    | y    | z    | U(eq) |
|--------|------|------|------|-------|
| H(2A)  | 3923 | 2705 | 1758 | 33    |
| H(4A)  | 6211 | 658  | 1729 | 61    |
| H(4B)  | 4835 | 390  | 1672 | 61    |
| H(7A)  | 7009 | 394  | 2942 | 79    |
| H(7B)  | 6384 | 859  | 3552 | 79    |
| H(7C)  | 6895 | 1261 | 2868 | 79    |
| H(8A)  | 5150 | -390 | 2794 | 65    |
| H(8B)  | 3873 | 5    | 2724 | 65    |
| H(8C)  | 4601 | 45   | 3448 | 65    |
| H(10A) | 3714 | 645  | 5747 | 33    |
| H(12A) | 6810 | 2044 | 5436 | 39    |
| H(12B) | 6033 | 2679 | 5805 | 39    |
| H(15A) | 6992 | 2939 | 4330 | 67    |
| H(15B) | 6064 | 2639 | 3756 | 67    |
| H(15C) | 6899 | 2082 | 4182 | 67    |
| H(16A) | 5252 | 3585 | 4917 | 62    |
| H(16B) | 4138 | 3116 | 5198 | 62    |
| H(16C) | 4308 | 3246 | 4373 | 62    |



Table 6. Torsion angles [°] for d18100.

---

|                        |             |
|------------------------|-------------|
| Ni(1)-O(1)-C(1)-C(2)   | 3.2(4)      |
| Ni(1)-O(1)-C(1)-C(6)   | -177.88(16) |
| O(1)-C(1)-C(2)-C(3)    | 1.1(4)      |
| C(6)-C(1)-C(2)-C(3)    | -177.8(2)   |
| C(5)-N(1)-C(3)-O(2)    | 2.6(3)      |
| Ni(1)-N(1)-C(3)-O(2)   | -178.83(16) |
| C(5)-N(1)-C(3)-C(2)    | -177.6(2)   |
| Ni(1)-N(1)-C(3)-C(2)   | 1.0(4)      |
| C(4)-O(2)-C(3)-N(1)    | 8.4(3)      |
| C(4)-O(2)-C(3)-C(2)    | -171.4(2)   |
| C(1)-C(2)-C(3)-N(1)    | -3.3(4)     |
| C(1)-C(2)-C(3)-O(2)    | 176.5(2)    |
| C(3)-O(2)-C(4)-C(5)    | -15.2(3)    |
| C(3)-N(1)-C(5)-C(7)    | 107.7(3)    |
| Ni(1)-N(1)-C(5)-C(7)   | -70.8(3)    |
| C(3)-N(1)-C(5)-C(8)    | -130.5(2)   |
| Ni(1)-N(1)-C(5)-C(8)   | 51.0(3)     |
| C(3)-N(1)-C(5)-C(4)    | -11.8(3)    |
| Ni(1)-N(1)-C(5)-C(4)   | 169.76(19)  |
| O(2)-C(4)-C(5)-N(1)    | 15.9(3)     |
| O(2)-C(4)-C(5)-C(7)    | -100.1(3)   |
| O(2)-C(4)-C(5)-C(8)    | 134.4(2)    |
| O(1)-C(1)-C(6)-F(2)    | 178.9(2)    |
| C(2)-C(1)-C(6)-F(2)    | -2.1(3)     |
| O(1)-C(1)-C(6)-F(3)    | 58.5(3)     |
| C(2)-C(1)-C(6)-F(3)    | -122.5(3)   |
| O(1)-C(1)-C(6)-F(1)    | -61.1(3)    |
| C(2)-C(1)-C(6)-F(1)    | 117.9(3)    |
| Ni(1)-O(3)-C(9)-C(10)  | 3.7(4)      |
| Ni(1)-O(3)-C(9)-C(14)  | -174.84(15) |
| O(3)-C(9)-C(10)-C(11)  | -0.5(4)     |
| C(14)-C(9)-C(10)-C(11) | 178.0(2)    |
| C(13)-N(2)-C(11)-O(4)  | -4.4(3)     |
| Ni(1)-N(2)-C(11)-O(4)  | -178.36(15) |

|                        |             |
|------------------------|-------------|
| C(13)-N(2)-C(11)-C(10) | 174.5(2)    |
| Ni(1)-N(2)-C(11)-C(10) | 0.6(4)      |
| C(12)-O(4)-C(11)-N(2)  | -8.7(3)     |
| C(12)-O(4)-C(11)-C(10) | 172.3(2)    |
| C(9)-C(10)-C(11)-N(2)  | -1.8(4)     |
| C(9)-C(10)-C(11)-O(4)  | 177.1(2)    |
| C(11)-O(4)-C(12)-C(13) | 17.4(3)     |
| C(11)-N(2)-C(13)-C(15) | 134.6(2)    |
| Ni(1)-N(2)-C(13)-C(15) | -51.7(3)    |
| C(11)-N(2)-C(13)-C(12) | 14.7(2)     |
| Ni(1)-N(2)-C(13)-C(12) | -171.62(16) |
| C(11)-N(2)-C(13)-C(16) | -103.1(3)   |
| Ni(1)-N(2)-C(13)-C(16) | 70.6(3)     |
| O(4)-C(12)-C(13)-N(2)  | -19.0(2)    |
| O(4)-C(12)-C(13)-C(15) | -137.0(2)   |
| O(4)-C(12)-C(13)-C(16) | 96.5(2)     |
| O(3)-C(9)-C(14)-F(5A)  | -170.8(13)  |
| C(10)-C(9)-C(14)-F(5A) | 10.5(13)    |
| O(3)-C(9)-C(14)-F(4A)  | -47.4(12)   |
| C(10)-C(9)-C(14)-F(4A) | 133.9(12)   |
| O(3)-C(9)-C(14)-F(6)   | -30.9(10)   |
| C(10)-C(9)-C(14)-F(6)  | 150.4(10)   |
| O(3)-C(9)-C(14)-F(5)   | 93.8(13)    |
| C(10)-C(9)-C(14)-F(5)  | -84.9(13)   |
| O(3)-C(9)-C(14)-F(4)   | -147.8(10)  |
| C(10)-C(9)-C(14)-F(4)  | 33.5(10)    |
| O(3)-C(9)-C(14)-F(6A)  | 68.1(10)    |
| C(10)-C(9)-C(14)-F(6A) | -110.6(10)  |

---

Symmetry transformations used to generate equivalent atoms:

# Poly-styrene Characterisation.<sup>14</sup>

<sup>1</sup>H NMR.

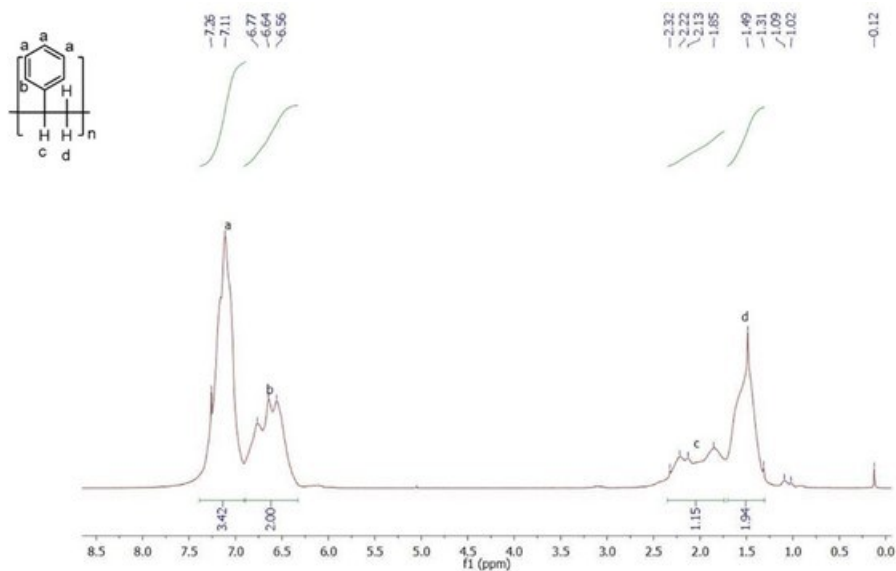

<sup>13</sup>C{<sup>1</sup>H} NMR.

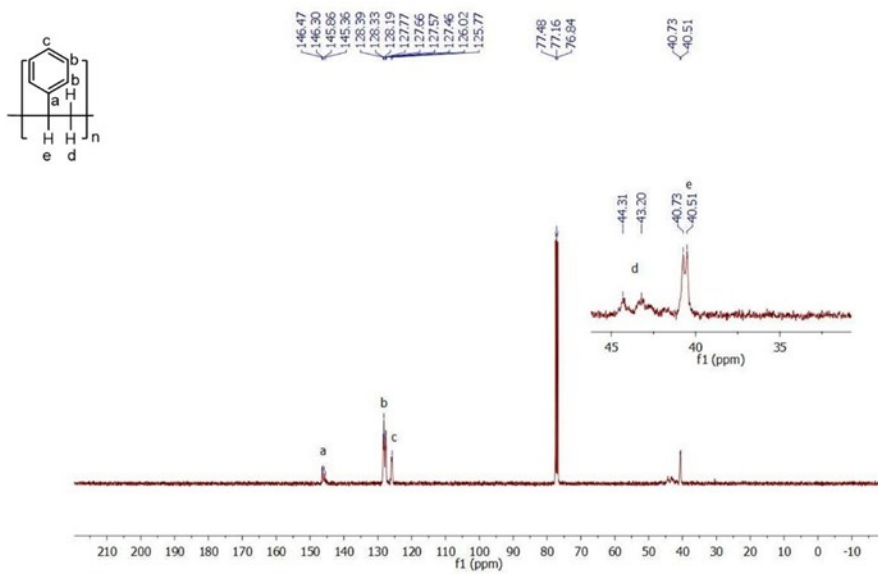

GPC analysis of polystyrene.

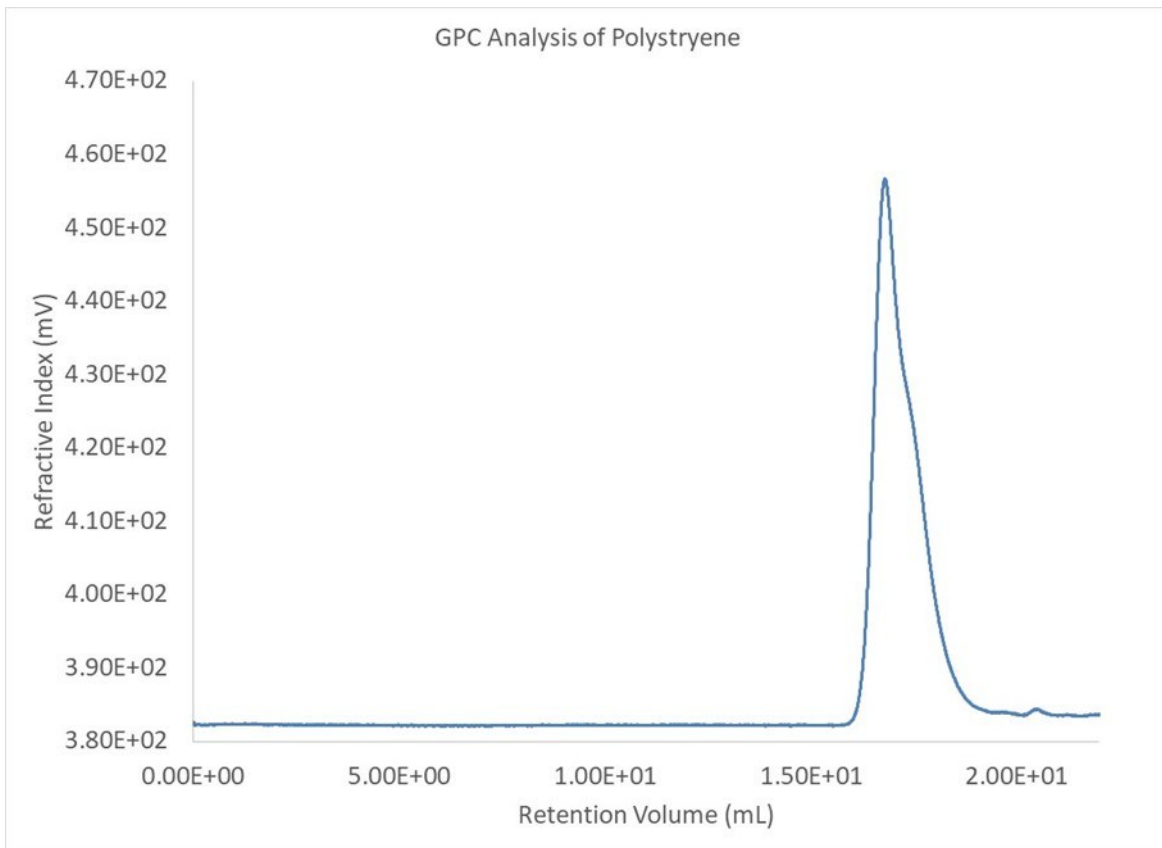

DSC of polystyrene.

Sample: JA-04-21 800 Aug 28 2018  
Size: 2.9000 mg  
Method: Cyclic

DSC

File: C:\...JA-04-21 800.001 Aug 28 2018  
Operator: JP  
Run Date: 28-Aug-2018 11:48  
Instrument: DSC Q20 V24.11 Build 124

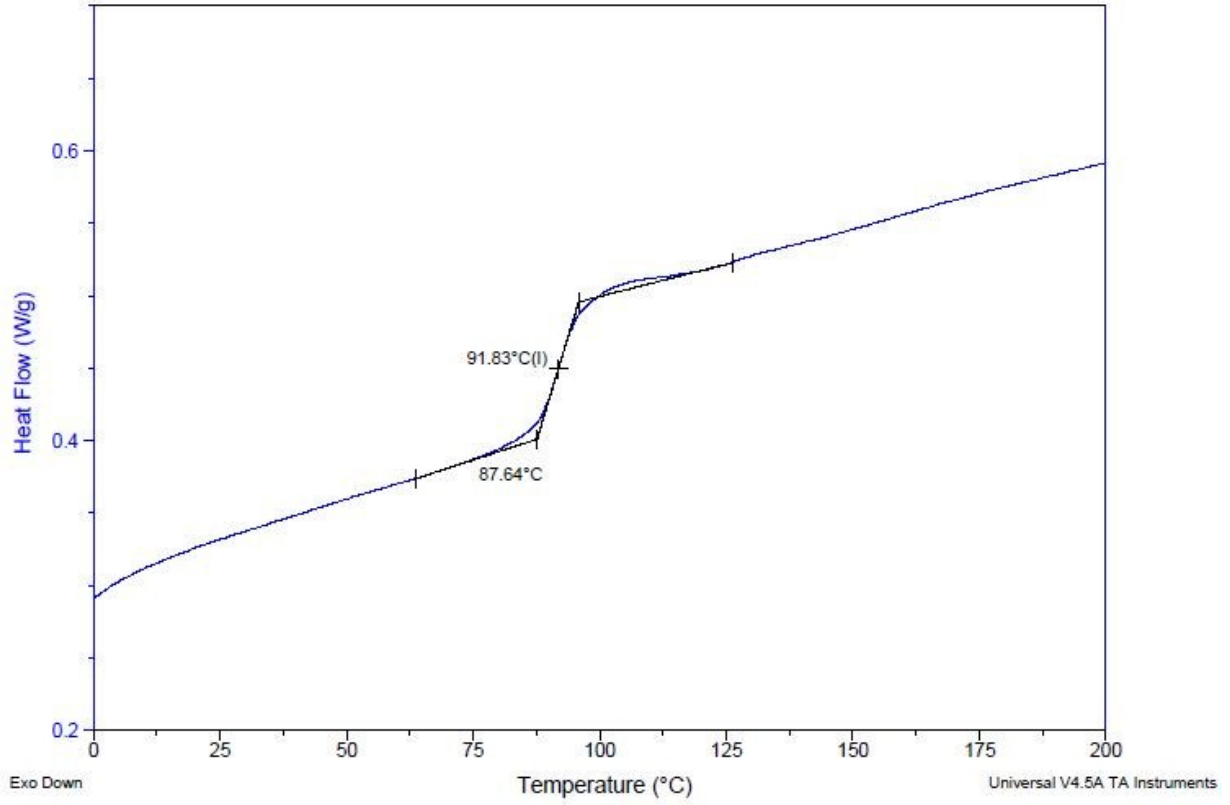

## References

- [1] G. A. Bain and J. F. Berry, *J. Chem. Edu.*, 2008, **85**, 532-536.
- [2] *Spartan 16.0*. Wavefunction Inc., Irvine, California, 2016.
- [3] Also see: Y.-M. Xu, K. Li, Y. Wang, W. Deng and Z.-J. Yao, *Polymers*, 2017, **9**, Article 105.
- [4] "Collect": Data Collection Software, Nonius b.v., Delft, The Netherlands, 1997-2002.
- [5] Z. Otwinowski and W. Minor, *Meth. Enzymol.*, 1997, **276**, 307-326.
- [6] A. Altomare, G. Cascarano, C. Giacovazzo, A. Guagliardi, M. C. Burla, G. Polidori and M. Camalli, *J. Appl. Cryst.*, 1994, **27**, 435.
- [7] G. M. Sheldrick, *Acta Cryst.*, 2008, **A64**, 112-122.
- [8] A. L. Spek, *Acta Cryst.*, 2009, **D65**, 148-155.
- [9] G. M. Sheldrick, *Acta Cryst.*, 2015, **A71**, 3-8.
- [10] G. M. Sheldrick, *Acta Cryst.*, 2015, **C71**, 3-8.
- [11] L. J. Farrugia, *J. Appl. Cryst.*, 2012, **45**, 849-854.
- [12] L. J. Farrugia, *J. Appl. Cryst.*, 1999, **32**, 837-838.
- [13] L. J. Farrugia, *J. Appl. Cryst.*, 1997, **30**, 565.
- [14] G. Wypych, *Handbook of Polymers*, ChemTec Publishing, Toronto, 2012, pp. 541-547.
